# Supplementary material for: Deep Learning-Based Pan-Cancer Classification Model Reveals Tissue-of-Origin Specific Gene Expression Signatures
Source: MDPI journal article supplement (doi:10.3390/cancers14051185), 2022-02-24
Supplement: s1 [file s1]

# Deep Learning-Based Pan-Cancer Classification Model Reveals Tissue-of-Origin Specific Gene Expression Signatures

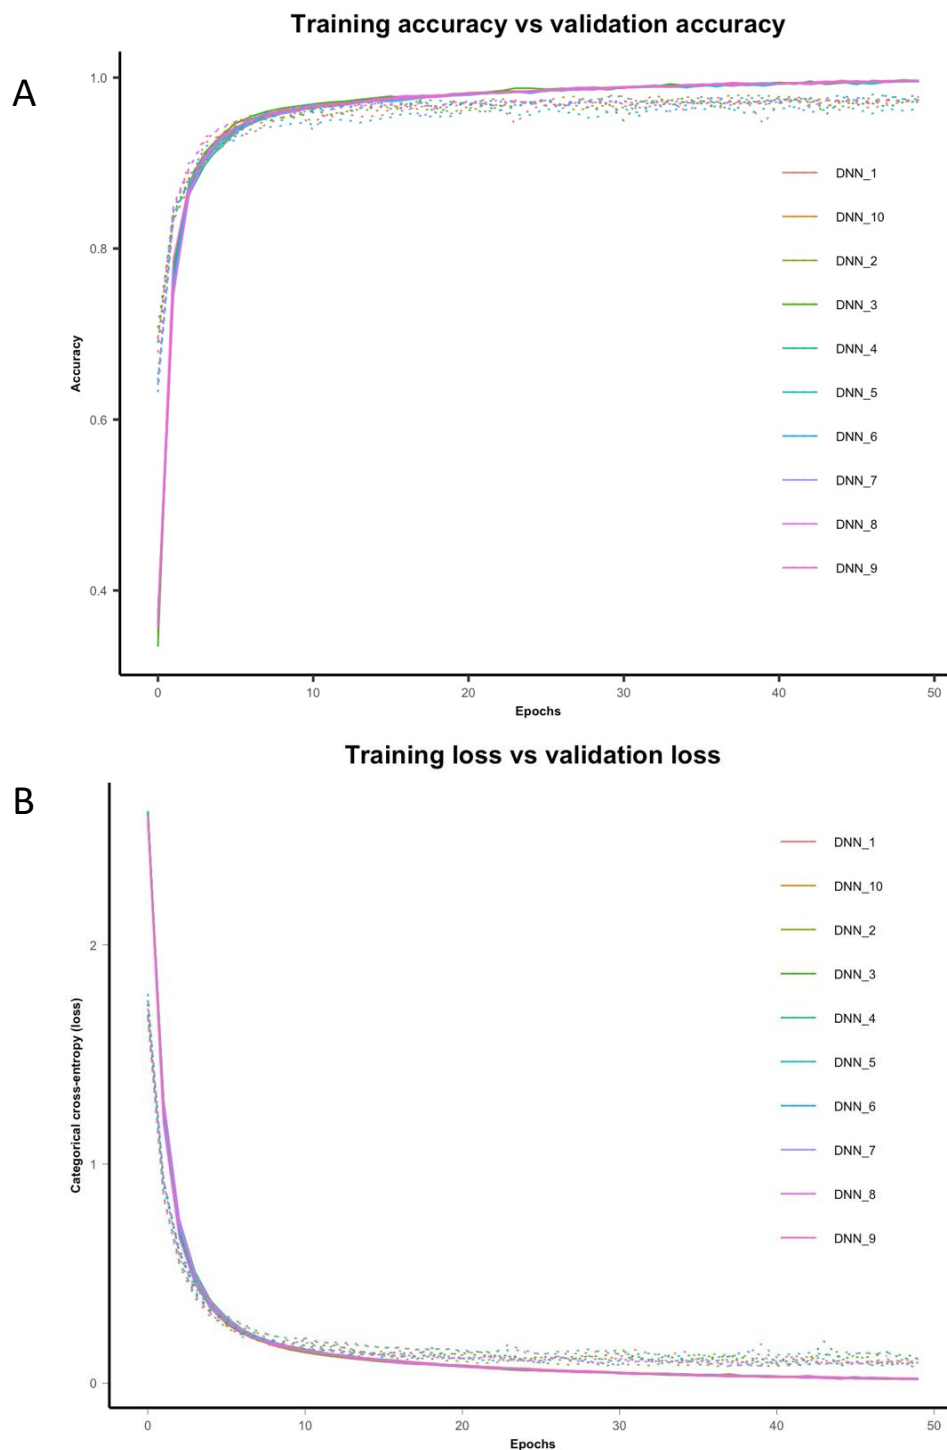

**Figure S1.** Model performed consistently during repeated training on randomly split data. Both A) accuracy and B) loss progress of model was consistent during repeated training of the model on randomly split 10 datasets.

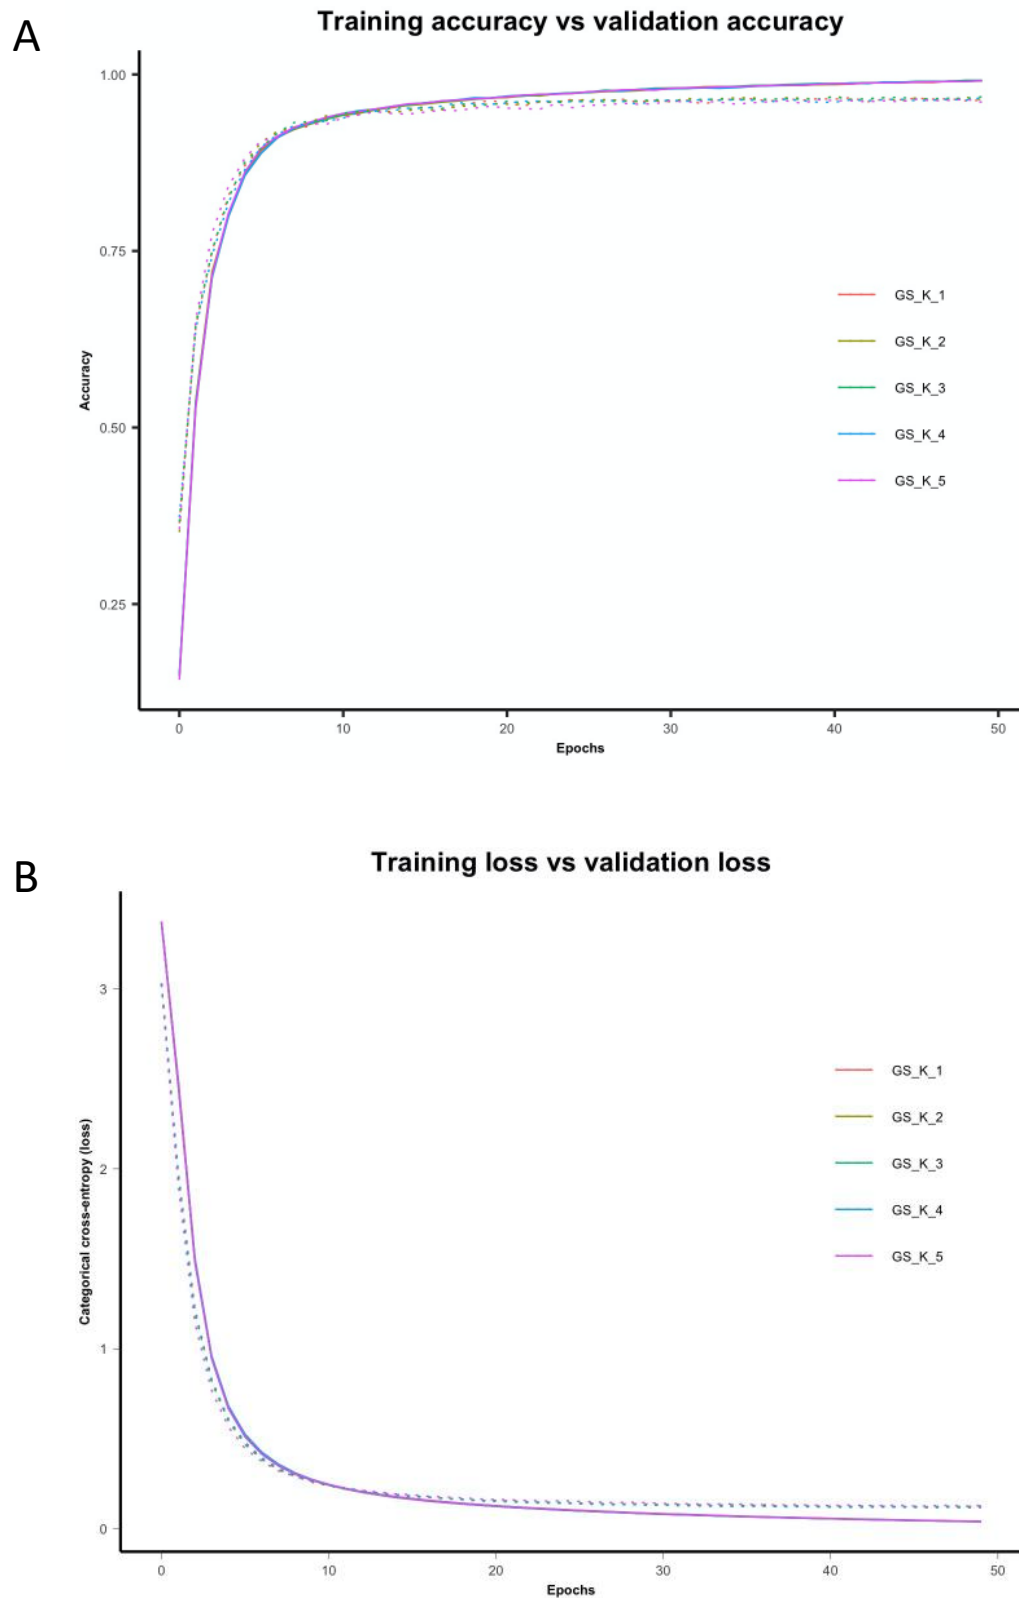

**Figure S2.** Five-fold cross validation of model based on 976 gene signatures. Performance of gene signatures based model remained stable and similar to original model during five-fold cross validation.

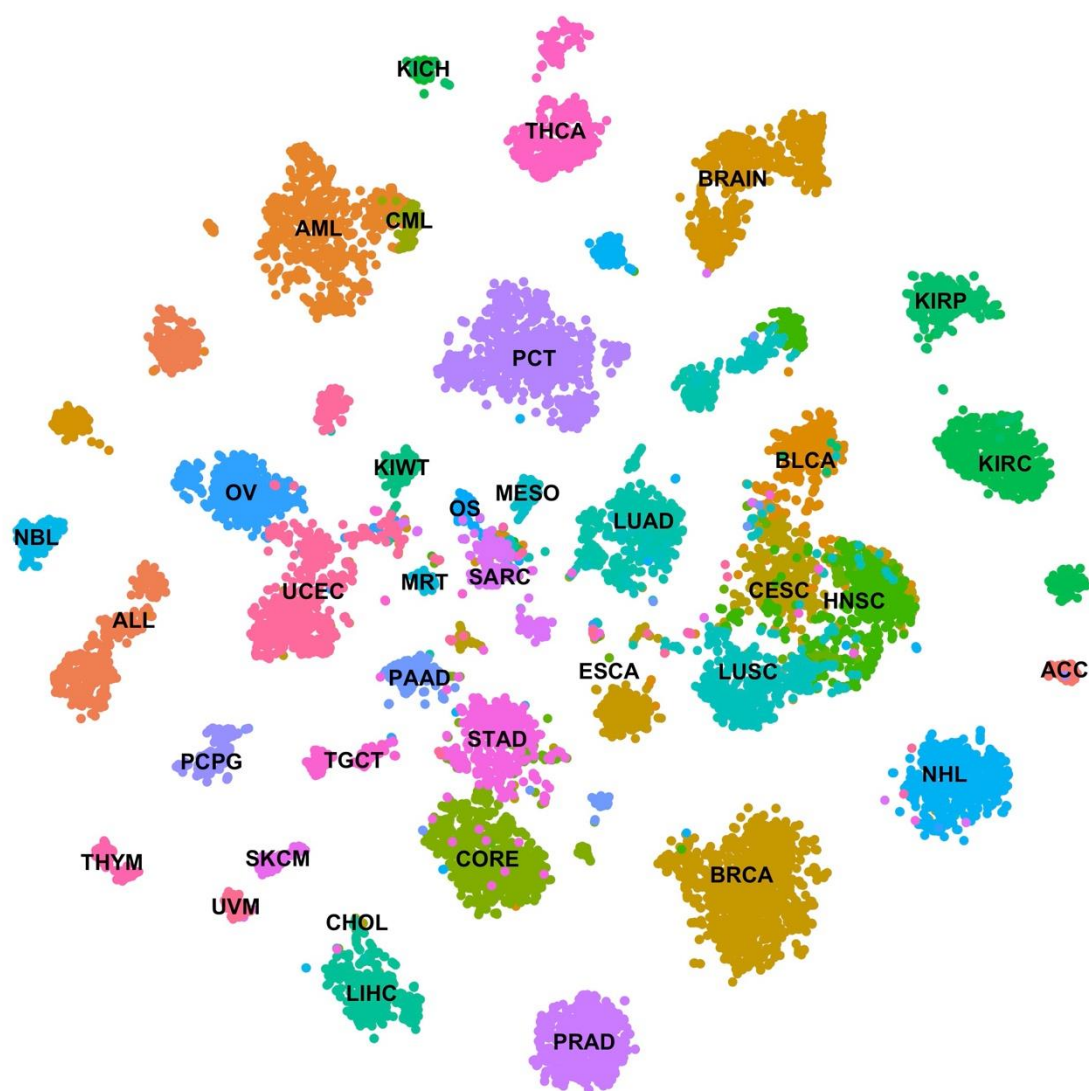

**Figure S3.** Unsupervised clustering of TCGA RNA-seq data using log transformed FPKM values of 976 gene signatures. Unsupervised clustering of TCGA data using 976 gene signatures provided distinct cancer clusters. Even subtypes such as UVM and SKCM formed well separated clusters.



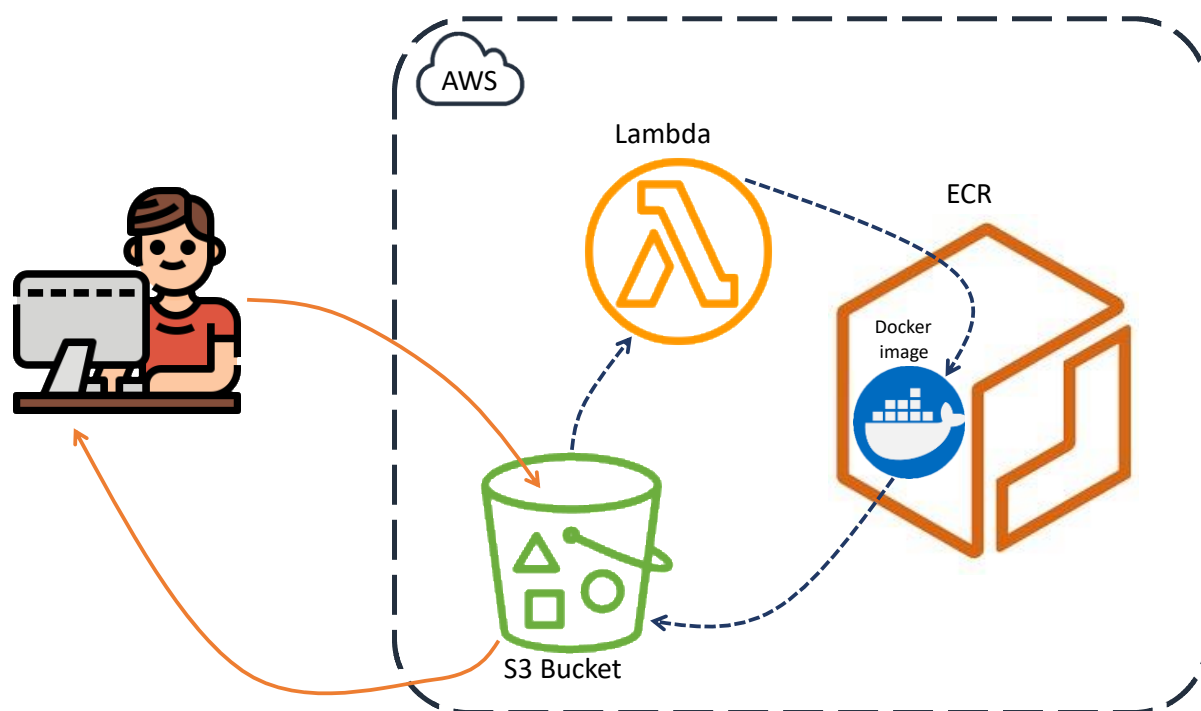

**Figure S5.** Serverless architecture of the DCAP. The user uses the web interface to upload the input CSV file. The data upload event initiates the lambda function, which then runs the ECR docker image to predict cancer type and perform t-SNE analysis. Finally, output files are saved to an S3 bucket, allowing the user to view and download the results

**Table S1.** Total numbers of tumor samples and cancer codes of different cancer types used in this study.

| Sr. No. | Cancer type                                                      | Code  | Samples |
|---------|------------------------------------------------------------------|-------|---------|
| 1.      | Adrenocortical carcinoma                                         | ACC   | 79      |
| 2.      | Acute lymphoid leukemia                                          | ALL   | 658     |
| 3.      | Acute Myeloid Leukemia                                           | AML   | 800     |
| 4.      | Bladder Urothelial Carcinoma                                     | BLCA  | 412     |
| 5.      | Brain Cancer                                                     | BRAIN | 812     |
| 6.      | Breast invasive carcinoma                                        | BRCA  | 1176    |
| 7.      | Cervical squamous cell carcinoma and endocervical adenocarcinoma | CESC  | 426     |
| 8.      | Cholangiocarcinoma                                               | CHOL  | 34      |
| 9.      | Chronic Myeloid Leukemia                                         | CML   | 76      |
| 10.     | Colorectal Cancer                                                | CORE  | 655     |
| 11.     | Esophageal carcinoma                                             | ESCA  | 161     |
| 12.     | Head and Neck squamous cell carcinoma                            | HNSC  | 610     |
| 13.     | Kidney Chromophobe                                               | KICH  | 65      |
| 14.     | Kidney renal clear cell carcinoma                                | KIRC  | 649     |
| 15.     | Kidney renal papillary cell carcinoma                            | KIRP  | 289     |
| 16.     | Kidney Wilms tumor                                               | KIWT  | 129     |
| 17.     | Liver hepatocellular carcinoma                                   | LIHC  | 374     |
| 18.     | Lung adenocarcinoma                                              | LUAD  | 646     |
| 19.     | Lung squamous cell carcinoma                                     | LUSC  | 611     |
| 20.     | Mesothelioma                                                     | MESO  | 86      |

|                         |                                      |      |       |
|-------------------------|--------------------------------------|------|-------|
| 21.                     | Malignant rhabdoid tumor             | MRT  | 62    |
| 22.                     | Neuroblastoma                        | NBL  | 160   |
| 23.                     | Non-Hodgkin's lymphoma               | NHL  | 660   |
| 24.                     | Osteosarcoma                         | OS   | 88    |
| 25.                     | Ovarian serous cystadenocarcinoma    | OV   | 450   |
| 26.                     | Pancreatic adenocarcinoma            | PAAD | 229   |
| 27.                     | Pheochromocytoma and Paragangliomas  | PCPG | 181   |
| 28.                     | Plasma Cell Tumors                   | PCT  | 859   |
| 29.                     | Prostate adenocarcinoma              | PRAD | 498   |
| 30.                     | Sarcoma                              | SARC | 257   |
| 31.                     | Skin Cutaneous Melanoma              | SKCM | 103   |
| 32.                     | Stomach adenocarcinoma               | STAD | 376   |
| 33.                     | Testicular Germ Cell Tumors          | TGCT | 156   |
| 34.                     | Thyroid carcinoma                    | THCA | 502   |
| 35.                     | Thymoma                              | THYM | 119   |
| 36.                     | Uterine Corpus Endometrial Carcinoma | UCEC | 709   |
| 37.                     | Uveal Melanoma                       | UVM  | 80    |
| Total number of samples |                                      |      | 14237 |

**Table S2.** Variance and maximum expression value of FPKM and log10 normalized data.

| Data                  | Variance    | Max expression value |
|-----------------------|-------------|----------------------|
| FPKM normalized data  | 23582909.87 | 141868.73            |
| Log10 normalized data | 1.41        | 5.15                 |

**Table S3.** Table below shows model accuracy, precision, recall and f1-score during five-fold cross validation.

| Fold number | Training accuracy (%) | Validation accuracy (%) | Test accuracy (%) | Precision (%) | Recall (%) | F1-score (%) |
|-------------|-----------------------|-------------------------|-------------------|---------------|------------|--------------|
| 1           | 99.53                 | 97.33                   | 96.87             | 97.03         | 96.87      | 96.88        |
| 2           | 99.49                 | 97.40                   | 97.61             | 97.71         | 97.61      | 97.62        |
| 3           | 99.56                 | 97.47                   | 97.29             | 97.37         | 97.29      | 97.30        |
| 4           | 99.72                 | 97.33                   | 96.98             | 97.08         | 96.98      | 96.94        |
| 5           | 99.60                 | 96.76                   | 96.94             | 97.02         | 96.94      | 96.91        |

**Table S4.** List of gene signatures identified through interpretation of deep learning model.

| Cancer | Gene Symbol | Occurrence frequency | Median FPKM | Enriched in cancers | Iteration |
|--------|-------------|----------------------|-------------|---------------------|-----------|
| ACC    | IGF2        | 8                    | 1647.49     | 3                   | iter2     |
| ACC    | DLK1        | 10                   | 1514.00     | 2                   | iter1     |
| ACC    | CYP17A1     | 9                    | 1239.17     | 1                   | iter1     |
| ACC    | STAR        | 10                   | 742.33      | 1                   | iter1     |
| ACC    | NPTX2       | 6                    | 413.74      | 1                   | iter2     |
| ACC    | SERPINA5    | 6                    | 324.33      | 2                   | iter1     |
| ACC    | CYP21A2     | 9                    | 287.25      | 1                   | iter1     |
| ACC    | SULT2A1     | 9                    | 272.68      | 2                   | iter1     |
| ACC    | CYP11A1     | 10                   | 256.25      | 1                   | iter1     |
| ACC    | SNCG        | 7                    | 241.88      | 2                   | iter2     |
| ACC    | MGARP       | 9                    | 218.56      | 1                   | iter1     |
| ACC    | HSPB6       | 7                    | 208.10      | 3                   | iter2     |
| ACC    | GSTA1       | 9                    | 190.36      | 3                   | iter2     |
| ACC    | TUBB4A      | 7                    | 154.12      | 5                   | iter2     |
| ACC    | NR5A1       | 10                   | 135.24      | 1                   | iter1     |

|     |            |    |        |   |       |
|-----|------------|----|--------|---|-------|
| ACC | MT3        | 6  | 109.59 | 2 | iter2 |
| ACC | TBX3       | 8  | 100.94 | 3 | iter3 |
| ACC | REEP6      | 5  | 89.75  | 5 | iter2 |
| ACC | CYP11B1    | 9  | 78.91  | 1 | iter1 |
| ACC | BEX1       | 6  | 64.74  | 5 | iter2 |
| ACC | FAM166B    | 5  | 61.07  | 1 | iter2 |
| ACC | INHA       | 5  | 56.10  | 1 | iter2 |
| ACC | KCNK3      | 8  | 55.63  | 1 | iter1 |
| ACC | PEG3       | 9  | 51.33  | 4 | iter2 |
| ACC | C7         | 5  | 49.59  | 5 | iter1 |
| ACC | CHGB       | 9  | 47.00  | 3 | iter1 |
| ACC | AGRP       | 9  | 43.61  | 1 | iter2 |
| ACC | GSTA3      | 9  | 34.89  | 1 | iter1 |
| ACC | CPB1       | 9  | 32.55  | 1 | iter1 |
| ACC | NR0B1      | 6  | 31.94  | 1 | iter2 |
| ACC | HSD3B2     | 9  | 25.92  | 1 | iter1 |
| ACC | PLA2G1B    | 5  | 23.07  | 1 | iter1 |
| ACC | AMHR2      | 9  | 22.82  | 1 | iter1 |
| ACC | FAM19A4    | 9  | 14.81  | 1 | iter2 |
| ACC | FAM43B     | 6  | 13.20  | 1 | iter3 |
| ALL | HBB        | 5  | 715.70 | 1 | iter1 |
| ALL | HIST1H1E   | 10 | 541.13 | 1 | iter3 |
| ALL | HIST1H4E   | 6  | 433.10 | 1 | iter2 |
| ALL | HIST1H1D   | 5  | 422.72 | 1 | iter1 |
| ALL | HIST1H3D   | 8  | 324.24 | 1 | iter2 |
| ALL | HIST1H3B   | 9  | 315.97 | 1 | iter1 |
| ALL | HIST2H2AC  | 10 | 275.52 | 1 | iter3 |
| ALL | HIST1H2BG  | 7  | 208.13 | 1 | iter3 |
| ALL | HIST1H1B   | 10 | 192.77 | 1 | iter2 |
| ALL | HIST1H2BH  | 5  | 188.82 | 1 | iter1 |
| ALL | HIST1H4C   | 7  | 184.71 | 1 | iter1 |
| ALL | HIST1H2BO  | 8  | 174.90 | 1 | iter2 |
| ALL | HIST1H2BF  | 10 | 172.60 | 1 | iter3 |
| ALL | HIST1H3F   | 10 | 124.29 | 1 | iter2 |
| ALL | HIST1H2AM  | 10 | 122.90 | 1 | iter2 |
| ALL | HIST1H3C   | 5  | 121.33 | 1 | iter1 |
| ALL | DNTT       | 10 | 120.16 | 2 | iter1 |
| ALL | HIST1H2AJ  | 10 | 117.24 | 1 | iter2 |
| ALL | HIST1H4D   | 6  | 117.06 | 1 | iter1 |
| ALL | HIST1H2AI  | 8  | 115.82 | 1 | iter3 |
| ALL | HIST1H2AH  | 10 | 111.21 | 1 | iter3 |
| ALL | HIST1H2BI  | 10 | 107.38 | 1 | iter2 |
| ALL | HIST2H2AB  | 9  | 103.75 | 1 | iter3 |
| ALL | HIST1H4B   | 5  | 102.94 | 1 | iter1 |
| ALL | HIST1H2BE  | 5  | 91.04  | 1 | iter2 |
| ALL | HIST1H3I   | 8  | 82.17  | 1 | iter2 |
| ALL | HIST1H4F   | 6  | 73.46  | 1 | iter1 |
| ALL | HIST1H2BL  | 10 | 69.89  | 1 | iter3 |
| ALL | HIST1H4A   | 9  | 69.11  | 1 | iter1 |
| ALL | HIST1H2AL  | 6  | 65.28  | 1 | iter2 |
| ALL | AL138751.1 | 8  | 64.70  | 1 | iter3 |
| ALL | C1orf228   | 9  | 54.02  | 3 | iter3 |
| ALL | HIST1H2AB  | 10 | 52.62  | 1 | iter3 |
| ALL | IGLL1      | 9  | 51.36  | 3 | iter1 |
| ALL | HIST1H2BB  | 7  | 46.49  | 1 | iter1 |
| ALL | HIST1H4L   | 8  | 36.73  | 1 | iter2 |

|       |           |    |         |   |       |
|-------|-----------|----|---------|---|-------|
| ALL   | TNF       | 9  | 27.03   | 1 | iter1 |
| ALL   | HBA1      | 10 | 26.82   | 1 | iter1 |
| ALL   | VPREB1    | 10 | 22.04   | 1 | iter1 |
| ALL   | HIST1H3J  | 10 | 18.66   | 1 | iter3 |
| ALL   | HIST1H3G  | 5  | 15.41   | 1 | iter3 |
| ALL   | AHSP      | 5  | 14.02   | 1 | iter3 |
| ALL   | ARPP21    | 7  | 11.05   | 2 | iter2 |
| AML   | MPO       | 10 | 502.61  | 2 | iter1 |
| AML   | RNASE2    | 10 | 260.27  | 2 | iter1 |
| AML   | AZU1      | 10 | 192.89  | 2 | iter1 |
| AML   | PRSS57    | 10 | 132.96  | 1 | iter1 |
| AML   | ELANE     | 10 | 129.44  | 2 | iter1 |
| AML   | PRTN3     | 10 | 95.23   | 2 | iter1 |
| AML   | CTSG      | 5  | 71.01   | 2 | iter2 |
| AML   | S100A12   | 7  | 62.29   | 3 | iter1 |
| AML   | FLT3      | 10 | 53.32   | 2 | iter1 |
| AML   | RNASE3    | 10 | 52.47   | 2 | iter1 |
| AML   | NFE2      | 5  | 44.53   | 2 | iter3 |
| AML   | PRAM1     | 9  | 41.55   | 2 | iter2 |
| AML   | PLAC8     | 9  | 37.32   | 4 | iter3 |
| AML   | P2RX1     | 9  | 35.95   | 4 | iter3 |
| AML   | RAB37     | 7  | 26.47   | 3 | iter3 |
| AML   | MTRNR2L12 | 10 | 25.00   | 3 | iter1 |
| AML   | SPINK2    | 7  | 23.23   | 1 | iter1 |
| AML   | C11orf21  | 5  | 22.01   | 2 | iter3 |
| AML   | MLC1      | 9  | 20.45   | 2 | iter1 |
| AML   | MS4A3     | 10 | 19.76   | 2 | iter2 |
| AML   | GATA2     | 6  | 19.48   | 5 | iter3 |
| AML   | TSPAN32   | 5  | 16.78   | 2 | iter3 |
| AML   | RAB44     | 10 | 16.24   | 2 | iter2 |
| AML   | GAPT      | 6  | 15.93   | 2 | iter2 |
| AML   | SPNS3     | 5  | 15.69   | 1 | iter3 |
| AML   | CLC       | 7  | 14.82   | 2 | iter3 |
| AML   | HOXA9     | 5  | 14.25   | 3 | iter1 |
| AML   | VSTM1     | 6  | 13.57   | 2 | iter2 |
| AML   | PADI4     | 6  | 12.63   | 2 | iter2 |
| AML   | TPSAB1    | 7  | 10.74   | 1 | iter3 |
| AML   | HBD       | 6  | 10.55   | 2 | iter1 |
| AML   | MTRNR2L8  | 10 | 10.50   | 2 | iter1 |
| BLCA  | KRT17     | 8  | 503.82  | 5 | iter1 |
| BLCA  | S100P     | 6  | 390.51  | 5 | iter2 |
| BLCA  | SNCG      | 7  | 190.09  | 2 | iter2 |
| BLCA  | UPK2      | 7  | 98.03   | 1 | iter1 |
| BLCA  | GATA3     | 9  | 64.54   | 4 | iter1 |
| BLCA  | UPK1B     | 7  | 62.30   | 2 | iter1 |
| BLCA  | VGLL1     | 7  | 37.84   | 1 | iter1 |
| BLCA  | DHRS2     | 7  | 37.83   | 1 | iter1 |
| BLCA  | UPK1A     | 8  | 31.15   | 1 | iter1 |
| BLCA  | KRT20     | 7  | 12.31   | 2 | iter1 |
| BLCA  | UPK3A     | 9  | 10.68   | 2 | iter2 |
| BLCA  | ACTG2     | 7  | 10.53   | 5 | iter1 |
| BRAIN | GFAP      | 10 | 2270.33 | 1 | iter1 |
| BRAIN | BCAN      | 9  | 529.82  | 1 | iter1 |
| BRAIN | PMP2      | 10 | 233.64  | 1 | iter1 |
| BRAIN | GPM6B     | 10 | 227.89  | 3 | iter3 |
| BRAIN | AGT       | 5  | 219.83  | 3 | iter2 |



|       |           |    |         |   |       |
|-------|-----------|----|---------|---|-------|
| BRAIN | PTPRZ1    | 9  | 170.00  | 1 | iter3 |
| BRAIN | AQP4      | 8  | 167.84  | 1 | iter1 |
| BRAIN | OLIG1     | 7  | 164.16  | 1 | iter2 |
| BRAIN | GPM6A     | 8  | 133.25  | 1 | iter1 |
| BRAIN | BAALC     | 6  | 116.81  | 1 | iter1 |
| BRAIN | MLC1      | 5  | 111.02  | 2 | iter1 |
| BRAIN | SOX8      | 7  | 92.31   | 1 | iter2 |
| BRAIN | C1QL1     | 8  | 89.39   | 4 | iter3 |
| BRAIN | C1orf61   | 6  | 81.99   | 1 | iter1 |
| BRAIN | ADCYAP1R1 | 7  | 80.01   | 1 | iter1 |
| BRAIN | OLIG2     | 10 | 73.35   | 1 | iter1 |
| BRAIN | NCAN      | 10 | 69.72   | 1 | iter2 |
| BRAIN | NCAM1     | 10 | 61.40   | 4 | iter2 |
| BRAIN | TTYH1     | 5  | 58.45   | 1 | iter2 |
| BRAIN | CTNND2    | 10 | 58.17   | 1 | iter1 |
| BRAIN | SLC1A2    | 9  | 52.48   | 1 | iter3 |
| BRAIN | PHYHIP1L  | 6  | 46.52   | 3 | iter2 |
| BRAIN | TIMP4     | 5  | 40.31   | 1 | iter2 |
| BRAIN | CACNG7    | 5  | 36.15   | 2 | iter1 |
| BRAIN | GPR37L1   | 6  | 33.28   | 1 | iter2 |
| BRAIN | TNR       | 9  | 30.90   | 1 | iter1 |
| BRAIN | LHFPL3    | 8  | 30.29   | 1 | iter2 |
| BRAIN | HEPACAM   | 10 | 28.99   | 1 | iter2 |
| BRAIN | SCRG1     | 8  | 25.52   | 1 | iter3 |
| BRAIN | GRIA3     | 6  | 17.69   | 1 | iter2 |
| BRAIN | NDP       | 5  | 17.12   | 1 | iter3 |
| BRAIN | C8orf46   | 10 | 16.89   | 1 | iter3 |
| BRAIN | MAG       | 9  | 15.96   | 1 | iter1 |
| BRAIN | AMER2     | 9  | 14.81   | 1 | iter2 |
| BRAIN | BRINP2    | 10 | 14.52   | 1 | iter3 |
| BRAIN | RFX4      | 8  | 14.02   | 1 | iter1 |
| BRAIN | GABBR2    | 8  | 11.59   | 1 | iter3 |
| BRAIN | MOG       | 5  | 10.75   | 1 | iter1 |
| BRCA  | MGP       | 9  | 450.03  | 3 | iter2 |
| BRCA  | AZGP1     | 10 | 263.54  | 3 | iter1 |
| BRCA  | SFRP2     | 10 | 195.86  | 4 | iter2 |
| BRCA  | POSTN     | 5  | 183.96  | 5 | iter2 |
| BRCA  | GATA3     | 10 | 163.90  | 4 | iter1 |
| BRCA  | SPDEF     | 7  | 92.15   | 3 | iter1 |
| BRCA  | PIP       | 10 | 42.56   | 1 | iter1 |
| BRCA  | TRPS1     | 10 | 40.59   | 1 | iter1 |
| BRCA  | KIAA1324  | 7  | 40.33   | 3 | iter2 |
| BRCA  | SCGB2A2   | 10 | 32.59   | 1 | iter1 |
| BRCA  | LTF       | 7  | 26.76   | 4 | iter1 |
| BRCA  | STC2      | 9  | 26.37   | 2 | iter2 |
| BRCA  | COMP      | 5  | 25.81   | 4 | iter3 |
| BRCA  | ZG16B     | 8  | 25.73   | 3 | iter3 |
| BRCA  | SCUBE2    | 5  | 19.22   | 2 | iter2 |
| BRCA  | IRX5      | 9  | 18.11   | 1 | iter1 |
| BRCA  | PRLR      | 10 | 16.97   | 1 | iter1 |
| BRCA  | LRRRC15   | 6  | 16.60   | 2 | iter3 |
| BRCA  | CILP      | 10 | 16.59   | 1 | iter2 |
| BRCA  | AR        | 9  | 13.92   | 2 | iter3 |
| BRCA  | LMX1B     | 10 | 10.88   | 1 | iter1 |
| CESC  | KRT5      | 7  | 1697.32 | 5 | iter1 |
| CESC  | KRT6A     | 9  | 1097.52 | 4 | iter1 |

|      |           |    |          |   |       |
|------|-----------|----|----------|---|-------|
| CESC | KRT17     | 7  | 1093.99  | 5 | iter1 |
| CESC | S100A8    | 5  | 718.38   | 4 | iter3 |
| CESC | KRT13     | 9  | 110.45   | 4 | iter2 |
| CESC | SERPINB3  | 10 | 90.73    | 2 | iter1 |
| CESC | CALML3    | 9  | 88.07    | 5 | iter1 |
| CESC | CXCL17    | 6  | 83.83    | 4 | iter1 |
| CESC | S100A7    | 7  | 54.46    | 4 | iter1 |
| CESC | SERPINB4  | 10 | 49.76    | 1 | iter1 |
| CESC | CDKN2A    | 10 | 47.86    | 4 | iter1 |
| CESC | LGALS7B   | 10 | 40.20    | 2 | iter1 |
| CESC | EPHX3     | 7  | 23.49    | 1 | iter1 |
| CESC | SERPINB13 | 8  | 22.17    | 3 | iter2 |
| CHOL | CRP       | 7  | 800.61   | 2 | iter1 |
| CHOL | SERPINA1  | 6  | 732.85   | 5 | iter3 |
| CHOL | DEFB1     | 6  | 701.71   | 3 | iter3 |
| CHOL | TM4SF4    | 6  | 565.04   | 2 | iter1 |
| CHOL | VTN       | 9  | 435.23   | 4 | iter1 |
| CHOL | APCS      | 8  | 274.01   | 2 | iter1 |
| CHOL | FGG       | 6  | 116.45   | 2 | iter1 |
| CHOL | GJB1      | 5  | 81.87    | 5 | iter2 |
| CHOL | DCDC2     | 5  | 80.68    | 1 | iter1 |
| CHOL | HABP2     | 6  | 70.94    | 2 | iter2 |
| CHOL | ASGR2     | 5  | 46.25    | 2 | iter3 |
| CHOL | ANXA13    | 7  | 44.87    | 1 | iter2 |
| CHOL | SFRP5     | 6  | 36.80    | 1 | iter1 |
| CHOL | ITIH5     | 5  | 35.86    | 1 | iter2 |
| CHOL | SCTR      | 5  | 32.54    | 1 | iter2 |
| CHOL | CLDN10    | 6  | 29.91    | 2 | iter1 |
| CHOL | CXCL6     | 5  | 25.78    | 1 | iter1 |
| CHOL | EPS8L3    | 6  | 21.60    | 4 | iter2 |
| CHOL | CHST4     | 6  | 12.97    | 1 | iter3 |
| CHOL | CFTR      | 5  | 12.93    | 4 | iter3 |
| CHOL | POF1B     | 5  | 11.20    | 5 | iter2 |
| CML  | S100A9    | 10 | 21819.00 | 1 | iter3 |
| CML  | S100A8    | 6  | 3759.62  | 4 | iter3 |
| CML  | CXCL8     | 6  | 873.72   | 1 | iter1 |
| CML  | G0S2      | 6  | 785.62   | 1 | iter2 |
| CML  | SPI1      | 6  | 515.25   | 1 | iter1 |
| CML  | ELANE     | 6  | 510.13   | 2 | iter1 |
| CML  | PGLYRP1   | 6  | 504.41   | 1 | iter1 |
| CML  | DEFA3     | 6  | 437.83   | 1 | iter2 |
| CML  | MMP8      | 7  | 369.72   | 1 | iter2 |
| CML  | DEFA4     | 9  | 340.83   | 1 | iter3 |
| CML  | PRTN3     | 5  | 266.68   | 2 | iter1 |
| CML  | FCN1      | 5  | 261.69   | 1 | iter1 |
| CML  | CEACAM8   | 9  | 237.22   | 1 | iter1 |
| CML  | BPI       | 7  | 232.77   | 1 | iter1 |
| CML  | FCGR3B    | 8  | 190.50   | 1 | iter2 |
| CML  | CTSG      | 7  | 179.73   | 2 | iter2 |
| CML  | GPR97     | 6  | 161.11   | 1 | iter1 |
| CML  | MMP25     | 6  | 149.24   | 1 | iter1 |
| CML  | CD177     | 7  | 120.35   | 1 | iter1 |
| CML  | CRISP3    | 5  | 112.04   | 1 | iter3 |
| CML  | ARG1      | 5  | 108.80   | 2 | iter3 |
| CML  | MGAM      | 10 | 59.63    | 1 | iter3 |
| CML  | OLFM4     | 6  | 53.35    | 4 | iter2 |

|      |           |    |        |   |       |
|------|-----------|----|--------|---|-------|
| CML  | CYP4F3    | 6  | 48.66  | 2 | iter1 |
| CML  | CXCR2     | 7  | 48.61  | 1 | iter3 |
| CML  | IL18RAP   | 5  | 47.42  | 1 | iter3 |
| CML  | MTRNR2L12 | 7  | 45.54  | 3 | iter1 |
| CML  | RGL4      | 7  | 45.23  | 1 | iter1 |
| CML  | GLT1D1    | 9  | 42.66  | 1 | iter2 |
| CML  | CEACAM3   | 9  | 32.65  | 1 | iter1 |
| CML  | CMTM2     | 5  | 23.77  | 1 | iter3 |
| CML  | SERPINB10 | 6  | 23.18  | 1 | iter2 |
| CML  | PF4       | 6  | 19.16  | 1 | iter2 |
| CML  | MTRNR2L8  | 8  | 18.73  | 2 | iter1 |
| CML  | EMR3      | 6  | 18.61  | 1 | iter2 |
| CORE | CEACAM5   | 10 | 913.58 | 1 | iter1 |
| CORE | TFF3      | 6  | 472.35 | 1 | iter1 |
| CORE | GPX2      | 7  | 446.06 | 5 | iter2 |
| CORE | LGALS4    | 9  | 397.63 | 4 | iter1 |
| CORE | TSPAN8    | 8  | 241.29 | 3 | iter1 |
| CORE | MUC13     | 7  | 176.18 | 2 | iter1 |
| CORE | CDH17     | 6  | 148.33 | 1 | iter1 |
| CORE | CDX1      | 10 | 120.56 | 1 | iter1 |
| CORE | PHGR1     | 7  | 118.19 | 2 | iter2 |
| CORE | FAM3D     | 6  | 107.52 | 1 | iter2 |
| CORE | FABP1     | 9  | 89.93  | 2 | iter1 |
| CORE | C10orf99  | 5  | 73.31  | 2 | iter2 |
| CORE | GPA33     | 9  | 70.75  | 1 | iter1 |
| CORE | DPEP1     | 8  | 69.20  | 1 | iter1 |
| CORE | NOX1      | 10 | 65.77  | 1 | iter1 |
| CORE | PRSS3     | 7  | 63.27  | 4 | iter1 |
| CORE | CDX2      | 8  | 61.69  | 1 | iter1 |
| CORE | ASCL2     | 5  | 57.80  | 1 | iter2 |
| CORE | VIL1      | 5  | 54.90  | 3 | iter1 |
| CORE | EPS8L3    | 8  | 49.97  | 4 | iter2 |
| CORE | HOXB9     | 9  | 49.28  | 3 | iter3 |
| CORE | HNF4A     | 8  | 43.29  | 4 | iter2 |
| CORE | CLRN3     | 10 | 42.21  | 5 | iter3 |
| CORE | POF1B     | 7  | 41.46  | 5 | iter2 |
| CORE | CCL24     | 6  | 40.77  | 1 | iter1 |
| CORE | FUT3      | 7  | 40.31  | 3 | iter3 |
| CORE | RNF43     | 8  | 39.81  | 1 | iter2 |
| CORE | SPINK4    | 10 | 32.88  | 1 | iter1 |
| CORE | AXIN2     | 8  | 28.90  | 1 | iter3 |
| CORE | CEACAM7   | 6  | 27.78  | 1 | iter2 |
| CORE | MEP1A     | 8  | 27.35  | 1 | iter2 |
| CORE | GUCY2C    | 7  | 22.39  | 1 | iter3 |
| CORE | TRIM31    | 5  | 21.14  | 2 | iter2 |
| CORE | MMP12     | 7  | 20.53  | 5 | iter3 |
| CORE | LEFTY1    | 7  | 18.79  | 1 | iter3 |
| CORE | SLC26A3   | 6  | 16.02  | 1 | iter3 |
| CORE | HOXB8     | 8  | 13.80  | 3 | iter2 |
| CORE | TRABD2A   | 5  | 13.63  | 1 | iter3 |
| CORE | TRIM15    | 5  | 13.08  | 1 | iter3 |
| ESCA | SPRR1B    | 10 | 192.64 | 4 | iter2 |
| ESCA | KRT14     | 7  | 152.87 | 5 | iter1 |
| ESCA | SPRR1A    | 5  | 54.55  | 5 | iter1 |
| ESCA | DSC3      | 7  | 28.51  | 4 | iter2 |
| ESCA | SPRR2A    | 5  | 28.20  | 4 | iter2 |

|      |           |    |         |   |       |
|------|-----------|----|---------|---|-------|
| ESCA | CALML3    | 8  | 24.30   | 5 | iter1 |
| ESCA | RHCG      | 5  | 16.62   | 4 | iter1 |
| ESCA | SPRR3     | 5  | 14.80   | 5 | iter1 |
| ESCA | HR        | 5  | 13.19   | 2 | iter2 |
| ESCA | CCL20     | 6  | 12.75   | 5 | iter2 |
| HNSC | KRT14     | 10 | 4117.88 | 5 | iter1 |
| HNSC | KRT5      | 10 | 2870.63 | 5 | iter1 |
| HNSC | KRT17     | 8  | 2330.19 | 5 | iter1 |
| HNSC | SPRR1A    | 6  | 672.59  | 5 | iter1 |
| HNSC | SPRR2A    | 5  | 288.83  | 4 | iter2 |
| HNSC | PKP1      | 6  | 245.39  | 4 | iter3 |
| HNSC | SPRR2E    | 7  | 201.66  | 1 | iter3 |
| HNSC | KRT6C     | 8  | 183.81  | 1 | iter2 |
| HNSC | COL17A1   | 5  | 166.04  | 2 | iter1 |
| HNSC | MMP1      | 6  | 159.56  | 3 | iter1 |
| HNSC | KRTDAP    | 5  | 153.76  | 1 | iter3 |
| HNSC | FGFBP1    | 7  | 153.48  | 2 | iter2 |
| HNSC | CALML3    | 9  | 121.08  | 5 | iter1 |
| HNSC | DSC3      | 10 | 99.94   | 4 | iter2 |
| HNSC | KRT13     | 9  | 98.82   | 4 | iter2 |
| HNSC | IVL       | 6  | 80.57   | 2 | iter3 |
| HNSC | LGALS7B   | 10 | 80.27   | 2 | iter1 |
| HNSC | CALML5    | 10 | 53.76   | 2 | iter1 |
| HNSC | PTHLH     | 8  | 41.74   | 2 | iter3 |
| HNSC | TGM1      | 6  | 38.74   | 3 | iter3 |
| HNSC | KRT15     | 7  | 35.44   | 5 | iter1 |
| HNSC | GBP6      | 6  | 28.21   | 2 | iter3 |
| HNSC | MMP10     | 7  | 27.62   | 2 | iter1 |
| HNSC | MMP3      | 10 | 26.08   | 2 | iter1 |
| HNSC | BNC1      | 8  | 24.84   | 3 | iter2 |
| HNSC | FAT2      | 6  | 21.70   | 3 | iter3 |
| HNSC | TMPRSS11D | 6  | 18.88   | 1 | iter1 |
| HNSC | IL36G     | 7  | 18.68   | 1 | iter2 |
| HNSC | DSG1      | 8  | 17.33   | 1 | iter2 |
| HNSC | RRAD      | 6  | 14.08   | 3 | iter2 |
| HNSC | HSPA2     | 8  | 13.16   | 5 | iter2 |
| HNSC | IL36RN    | 5  | 11.97   | 1 | iter3 |
| HNSC | HEPHL1    | 8  | 11.40   | 1 | iter2 |
| KICH | PVALB     | 9  | 573.86  | 1 | iter1 |
| KICH | HSD11B2   | 6  | 502.87  | 1 | iter2 |
| KICH | ATP6V0D2  | 9  | 399.15  | 1 | iter1 |
| KICH | CA12      | 5  | 396.89  | 1 | iter3 |
| KICH | MAL       | 6  | 316.57  | 4 | iter3 |
| KICH | FOXI1     | 9  | 256.14  | 1 | iter1 |
| KICH | ATP6V1B1  | 10 | 251.43  | 2 | iter1 |
| KICH | CLCNKB    | 8  | 248.86  | 1 | iter1 |
| KICH | KLK1      | 9  | 216.88  | 1 | iter1 |
| KICH | ATP6V0A4  | 9  | 209.58  | 1 | iter1 |
| KICH | TMEM213   | 9  | 191.38  | 1 | iter1 |
| KICH | SLC4A1    | 7  | 152.94  | 1 | iter2 |
| KICH | ERP27     | 7  | 136.94  | 1 | iter3 |
| KICH | CLDN8     | 10 | 104.55  | 1 | iter1 |
| KICH | HEPACAM2  | 6  | 102.50  | 1 | iter2 |
| KICH | DMRT2     | 8  | 101.51  | 1 | iter2 |
| KICH | ATP6V1G3  | 6  | 101.47  | 1 | iter1 |
| KICH | STAP1     | 8  | 99.69   | 3 | iter2 |

|      |           |    |         |   |       |
|------|-----------|----|---------|---|-------|
| KICH | TRIM50    | 8  | 60.90   | 1 | iter1 |
| KICH | PTGER3    | 9  | 49.85   | 1 | iter1 |
| KICH | RHBG      | 7  | 46.62   | 1 | iter2 |
| KICH | TMEM72    | 8  | 39.10   | 1 | iter3 |
| KICH | BSND      | 9  | 35.13   | 1 | iter1 |
| KICH | FGF9      | 7  | 19.90   | 1 | iter3 |
| KICH | TMEM52B   | 5  | 19.61   | 1 | iter2 |
| KICH | GCGR      | 5  | 19.42   | 1 | iter1 |
| KICH | HOXB9     | 8  | 14.75   | 3 | iter3 |
| KICH | HOXD8     | 5  | 12.22   | 4 | iter2 |
| KICH | LRRC14B   | 6  | 10.86   | 1 | iter3 |
| KICH | SFTPB     | 6  | 10.31   | 4 | iter1 |
| KIRC | NDUFA4L2  | 7  | 467.64  | 1 | iter1 |
| KIRC | NAT8      | 10 | 202.85  | 3 | iter1 |
| KIRC | GSTA1     | 6  | 148.71  | 3 | iter2 |
| KIRC | RBP5      | 5  | 125.52  | 3 | iter2 |
| KIRC | CA9       | 9  | 113.63  | 2 | iter2 |
| KIRC | UGT2B7    | 10 | 88.13   | 3 | iter1 |
| KIRC | ENPP3     | 7  | 80.13   | 1 | iter3 |
| KIRC | BHMT2     | 5  | 60.68   | 3 | iter1 |
| KIRC | SLC3A1    | 8  | 60.52   | 2 | iter2 |
| KIRC | BHMT      | 9  | 60.11   | 2 | iter1 |
| KIRC | CLDN2     | 10 | 57.92   | 4 | iter2 |
| KIRC | ENPEP     | 7  | 55.99   | 1 | iter1 |
| KIRC | GSTA2     | 6  | 47.26   | 2 | iter1 |
| KIRC | SLC28A1   | 9  | 43.80   | 2 | iter1 |
| KIRC | PDZK1     | 7  | 42.67   | 4 | iter2 |
| KIRC | UGT2A3    | 5  | 42.53   | 3 | iter2 |
| KIRC | FXD2      | 9  | 34.97   | 3 | iter1 |
| KIRC | LRP2      | 9  | 32.25   | 2 | iter1 |
| KIRC | CDHR5     | 5  | 31.91   | 5 | iter3 |
| KIRC | SLC6A13   | 6  | 31.18   | 2 | iter1 |
| KIRC | SLC22A2   | 9  | 30.89   | 2 | iter2 |
| KIRC | CUBN      | 7  | 30.52   | 1 | iter2 |
| KIRC | SLC6A3    | 9  | 28.41   | 1 | iter1 |
| KIRC | SEMA5B    | 8  | 24.93   | 1 | iter2 |
| KIRC | C14orf105 | 7  | 19.22   | 2 | iter1 |
| KIRC | SLC16A12  | 6  | 18.56   | 2 | iter3 |
| KIRC | UGT1A9    | 5  | 16.17   | 1 | iter1 |
| KIRC | DMGDH     | 5  | 15.75   | 2 | iter3 |
| KIRC | ACSM2B    | 8  | 15.55   | 2 | iter3 |
| KIRC | DPYS      | 5  | 14.48   | 2 | iter3 |
| KIRC | FABP7     | 8  | 13.76   | 2 | iter1 |
| KIRC | NR1H4     | 5  | 13.31   | 3 | iter3 |
| KIRC | AGXT2     | 8  | 12.64   | 1 | iter3 |
| KIRC | RNF186    | 5  | 11.52   | 2 | iter3 |
| KIRC | SLC22A11  | 6  | 11.22   | 2 | iter2 |
| KIRC | PNCK      | 8  | 10.21   | 1 | iter3 |
| KIRP | CRYAB     | 7  | 1013.50 | 2 | iter2 |
| KIRP | PIGR      | 7  | 419.25  | 3 | iter2 |
| KIRP | TMEM27    | 5  | 121.40  | 2 | iter1 |
| KIRP | NAT8      | 10 | 112.84  | 3 | iter1 |
| KIRP | TFPI2     | 5  | 88.95   | 1 | iter3 |
| KIRP | UGT2B7    | 9  | 87.19   | 3 | iter1 |
| KIRP | CLDN2     | 7  | 77.66   | 4 | iter2 |
| KIRP | CYS1      | 5  | 74.27   | 2 | iter2 |

|      |           |    |         |   |       |
|------|-----------|----|---------|---|-------|
| KIRP | CDH16     | 8  | 63.60   | 3 | iter1 |
| KIRP | KCNJ16    | 9  | 57.88   | 3 | iter1 |
| KIRP | PDZK1     | 7  | 56.17   | 4 | iter2 |
| KIRP | SLC3A1    | 8  | 54.67   | 2 | iter2 |
| KIRP | HNF1B     | 7  | 54.28   | 3 | iter1 |
| KIRP | LYG1      | 5  | 42.81   | 2 | iter2 |
| KIRP | MIOX      | 8  | 41.00   | 2 | iter2 |
| KIRP | GLYAT     | 6  | 36.92   | 3 | iter1 |
| KIRP | TMEM252   | 6  | 36.92   | 1 | iter3 |
| KIRP | BBOX1     | 8  | 35.59   | 3 | iter1 |
| KIRP | C14orf105 | 8  | 35.38   | 2 | iter1 |
| KIRP | ACSM2A    | 5  | 29.76   | 3 | iter1 |
| KIRP | AOC1      | 7  | 28.18   | 5 | iter3 |
| KIRP | POU3F3    | 5  | 26.16   | 4 | iter1 |
| KIRP | SLC17A1   | 8  | 24.26   | 2 | iter1 |
| KIRP | CLRN3     | 5  | 24.16   | 5 | iter3 |
| KIRP | LRRN4     | 5  | 23.69   | 3 | iter1 |
| KIRP | KCNJ15    | 7  | 22.08   | 3 | iter3 |
| KIRP | ACMSD     | 5  | 21.09   | 3 | iter1 |
| KIRP | SMTNL2    | 5  | 17.91   | 2 | iter1 |
| KIRP | HOGA1     | 7  | 15.98   | 1 | iter2 |
| KIRP | KL        | 6  | 15.27   | 2 | iter2 |
| KIRP | PPP1R1A   | 8  | 14.34   | 1 | iter3 |
| KIRP | TRABD2B   | 7  | 14.33   | 2 | iter2 |
| KIRP | HOXA5     | 5  | 13.36   | 4 | iter3 |
| KIRP | SPX       | 8  | 12.95   | 2 | iter3 |
| KIRP | SLC17A3   | 6  | 11.32   | 2 | iter1 |
| KIWT | IGF2      | 5  | 2543.73 | 3 | iter2 |
| KIWT | NNAT      | 10 | 299.82  | 2 | iter1 |
| KIWT | SIX2      | 5  | 241.57  | 1 | iter1 |
| KIWT | PEG10     | 8  | 159.68  | 2 | iter2 |
| KIWT | UNCX      | 10 | 138.51  | 1 | iter1 |
| KIWT | PAX2      | 10 | 134.53  | 1 | iter1 |
| KIWT | COL2A1    | 7  | 111.68  | 1 | iter1 |
| KIWT | SALL1     | 10 | 104.59  | 1 | iter1 |
| KIWT | SHISA3    | 6  | 86.87   | 1 | iter3 |
| KIWT | HOXC10    | 6  | 85.91   | 2 | iter2 |
| KIWT | LYPD1     | 6  | 84.23   | 2 | iter1 |
| KIWT | CNTFR     | 9  | 82.96   | 3 | iter1 |
| KIWT | SHISA2    | 6  | 80.16   | 1 | iter1 |
| KIWT | EYA1      | 8  | 78.70   | 1 | iter1 |
| KIWT | DACH1     | 7  | 67.62   | 1 | iter1 |
| KIWT | MEOX1     | 7  | 57.34   | 1 | iter1 |
| KIWT | FOXC2     | 10 | 54.49   | 1 | iter2 |
| KIWT | WASF3     | 8  | 50.87   | 2 | iter1 |
| KIWT | HAS2      | 6  | 48.20   | 1 | iter3 |
| KIWT | FOXC1     | 5  | 43.39   | 4 | iter3 |
| KIWT | HOXA11    | 6  | 43.31   | 1 | iter3 |
| KIWT | MYCN      | 5  | 38.41   | 3 | iter2 |
| KIWT | CITED1    | 10 | 34.79   | 4 | iter1 |
| KIWT | DAPL1     | 5  | 34.31   | 4 | iter2 |
| KIWT | HOXD11    | 5  | 29.94   | 1 | iter1 |
| KIWT | C1QTNF4   | 6  | 28.13   | 3 | iter1 |
| KIWT | GFRA1     | 8  | 27.42   | 2 | iter1 |
| KIWT | TRABD2B   | 10 | 25.65   | 2 | iter2 |
| KIWT | FOXD1     | 5  | 17.82   | 1 | iter2 |

|      |          |    |          |   |       |
|------|----------|----|----------|---|-------|
| KIWT | GPR64    | 6  | 17.62    | 1 | iter2 |
| KIWT | FGF8     | 6  | 15.64    | 1 | iter1 |
| KIWT | CDO1     | 6  | 15.17    | 3 | iter2 |
| KIWT | BMPER    | 7  | 15.00    | 1 | iter2 |
| KIWT | TMEM100  | 5  | 13.93    | 2 | iter3 |
| KIWT | GDNF     | 5  | 13.88    | 1 | iter3 |
| KIWT | BRINP1   | 5  | 11.24    | 1 | iter2 |
| KIWT | PEG3     | 5  | 10.46    | 4 | iter2 |
| KIWT | TCF21    | 5  | 10.23    | 2 | iter3 |
| KIWT | SHISA8   | 8  | 10.12    | 1 | iter2 |
| LIHC | ALB      | 10 | 12188.40 | 1 | iter1 |
| LIHC | APOA2    | 8  | 9313.44  | 1 | iter1 |
| LIHC | APOC3    | 5  | 3144.20  | 1 | iter1 |
| LIHC | RBP4     | 9  | 2946.14  | 1 | iter3 |
| LIHC | APOH     | 8  | 2785.61  | 1 | iter1 |
| LIHC | AMBP     | 10 | 2440.03  | 1 | iter1 |
| LIHC | VTN      | 6  | 2033.85  | 4 | iter1 |
| LIHC | FGA      | 6  | 2017.55  | 1 | iter1 |
| LIHC | FGB      | 5  | 1778.57  | 1 | iter1 |
| LIHC | ORM1     | 6  | 1721.49  | 1 | iter1 |
| LIHC | SERPINC1 | 10 | 1282.02  | 1 | iter2 |
| LIHC | FGG      | 5  | 1193.44  | 2 | iter1 |
| LIHC | AHSG     | 6  | 977.85   | 1 | iter3 |
| LIHC | GC       | 10 | 904.57   | 1 | iter1 |
| LIHC | HP       | 9  | 855.16   | 1 | iter2 |
| LIHC | TF       | 9  | 641.75   | 1 | iter3 |
| LIHC | ORM2     | 8  | 633.50   | 1 | iter1 |
| LIHC | APCS     | 7  | 622.77   | 2 | iter1 |
| LIHC | KNG1     | 9  | 544.85   | 1 | iter2 |
| LIHC | ITIH2    | 10 | 538.00   | 1 | iter1 |
| LIHC | F2       | 7  | 486.78   | 1 | iter2 |
| LIHC | HPX      | 8  | 459.99   | 1 | iter3 |
| LIHC | ITIH1    | 8  | 313.57   | 1 | iter1 |
| LIHC | SERPIND1 | 8  | 309.86   | 1 | iter2 |
| LIHC | HRG      | 5  | 303.85   | 1 | iter3 |
| LIHC | APOB     | 10 | 281.11   | 1 | iter2 |
| LIHC | CPB2     | 10 | 242.98   | 1 | iter1 |
| LIHC | UGT2B4   | 8  | 240.31   | 1 | iter2 |
| LIHC | FGL1     | 10 | 231.24   | 1 | iter2 |
| LIHC | ITIH3    | 6  | 230.91   | 1 | iter2 |
| LIHC | LBP      | 7  | 229.77   | 1 | iter1 |
| LIHC | IGFBP1   | 8  | 228.68   | 1 | iter1 |
| LIHC | C8G      | 6  | 213.56   | 1 | iter2 |
| LIHC | SERPINA6 | 7  | 208.72   | 2 | iter2 |
| LIHC | AGXT     | 7  | 198.34   | 1 | iter3 |
| LIHC | MAT1A    | 5  | 188.64   | 1 | iter3 |
| LIHC | ASGR2    | 7  | 182.54   | 2 | iter3 |
| LIHC | CRP      | 10 | 154.48   | 2 | iter1 |
| LIHC | PLG      | 7  | 145.77   | 1 | iter2 |
| LIHC | CFHR1    | 9  | 145.43   | 1 | iter2 |
| LIHC | BAAT     | 10 | 136.69   | 1 | iter2 |
| LIHC | ADH1A    | 5  | 131.61   | 1 | iter3 |
| LIHC | SLC38A3  | 5  | 121.81   | 1 | iter3 |
| LIHC | TFR2     | 6  | 121.34   | 1 | iter3 |
| LIHC | PROC     | 8  | 112.70   | 1 | iter3 |
| LIHC | C8B      | 9  | 93.80    | 1 | iter2 |

|      |            |    |        |   |       |
|------|------------|----|--------|---|-------|
| LIHC | G6PC       | 6  | 89.10  | 1 | iter3 |
| LIHC | HAO1       | 6  | 82.75  | 1 | iter3 |
| LIHC | AKR1C4     | 6  | 82.64  | 1 | iter3 |
| LIHC | CYP2E1     | 5  | 74.76  | 1 | iter2 |
| LIHC | HFE2       | 5  | 70.97  | 1 | iter3 |
| LIHC | F13B       | 9  | 39.38  | 1 | iter3 |
| LIHC | F7         | 8  | 37.66  | 1 | iter3 |
| LIHC | PGLYRP2    | 6  | 25.39  | 1 | iter3 |
| LIHC | FGF21      | 5  | 10.35  | 1 | iter3 |
| LUAD | SFTPB      | 10 | 989.92 | 4 | iter1 |
| LUAD | SFTPA2     | 10 | 503.12 | 2 | iter1 |
| LUAD | CEACAM6    | 5  | 425.91 | 4 | iter1 |
| LUAD | SFTPA1     | 10 | 395.72 | 2 | iter1 |
| LUAD | SLC34A2    | 10 | 322.30 | 4 | iter1 |
| LUAD | NAPSA      | 10 | 296.90 | 3 | iter1 |
| LUAD | SFTA2      | 6  | 143.77 | 1 | iter1 |
| LUAD | CXCL17     | 6  | 131.56 | 4 | iter1 |
| LUAD | SFTPC      | 10 | 62.80  | 1 | iter1 |
| LUAD | SFTPD      | 9  | 62.70  | 2 | iter1 |
| LUAD | SCGB3A2    | 10 | 55.32  | 3 | iter1 |
| LUAD | NKX2-1     | 9  | 50.07  | 2 | iter1 |
| LUAD | C16orf89   | 10 | 46.03  | 3 | iter2 |
| LUAD | CCL18      | 6  | 43.67  | 5 | iter2 |
| LUAD | C4BPA      | 5  | 41.54  | 3 | iter1 |
| LUAD | SCGB3A1    | 10 | 40.92  | 1 | iter1 |
| LUAD | CP         | 5  | 37.35  | 5 | iter2 |
| LUAD | CTSE       | 5  | 34.92  | 3 | iter1 |
| LUAD | AGR3       | 8  | 34.59  | 5 | iter2 |
| LUAD | SFTA3      | 10 | 27.95  | 2 | iter1 |
| LUAD | CLIC6      | 7  | 25.41  | 3 | iter3 |
| LUAD | SLC22A31   | 10 | 25.26  | 2 | iter2 |
| LUAD | SCGB1A1    | 9  | 20.54  | 2 | iter1 |
| LUAD | MARCO      | 8  | 16.91  | 1 | iter3 |
| LUAD | NDNF       | 10 | 16.10  | 3 | iter2 |
| LUAD | CAPN8      | 7  | 16.04  | 2 | iter2 |
| LUAD | ST6GALNAC1 | 8  | 15.88  | 5 | iter2 |
| LUAD | SDR16C5    | 5  | 13.68  | 2 | iter2 |
| LUAD | FAM83A     | 5  | 11.50  | 3 | iter2 |
| LUAD | CYP4B1     | 6  | 10.89  | 2 | iter3 |
| LUAD | BPIFB1     | 9  | 10.65  | 1 | iter2 |
| LUAD | SCNN1B     | 5  | 10.12  | 1 | iter2 |
| LUAD | CCL13      | 5  | 10.09  | 1 | iter1 |
| LUSC | KRT6A      | 10 | 975.03 | 4 | iter1 |
| LUSC | KRT5       | 9  | 962.51 | 5 | iter1 |
| LUSC | SFTPB      | 10 | 125.14 | 4 | iter1 |
| LUSC | KRT16      | 7  | 104.72 | 4 | iter2 |
| LUSC | SFTPA2     | 10 | 95.92  | 2 | iter1 |
| LUSC | CALML3     | 8  | 69.84  | 5 | iter1 |
| LUSC | SFTPA1     | 10 | 66.03  | 2 | iter1 |
| LUSC | KRT6B      | 8  | 64.25  | 5 | iter2 |
| LUSC | TP63       | 5  | 61.53  | 5 | iter3 |
| LUSC | DSG3       | 5  | 59.46  | 4 | iter1 |
| LUSC | MMP12      | 8  | 35.51  | 5 | iter3 |
| LUSC | PTHLH      | 7  | 25.32  | 2 | iter3 |
| LUSC | NTS        | 10 | 20.57  | 1 | iter2 |
| LUSC | SCGB3A2    | 10 | 17.04  | 3 | iter1 |



|      |          |    |        |   |       |
|------|----------|----|--------|---|-------|
| LUSC | SPRR2D   | 5  | 16.55  | 4 | iter2 |
| LUSC | DAPL1    | 8  | 16.48  | 4 | iter2 |
| LUSC | CES1     | 5  | 15.93  | 3 | iter3 |
| LUSC | SFTPD    | 10 | 13.69  | 2 | iter1 |
| LUSC | NAPSA    | 10 | 12.39  | 3 | iter1 |
| LUSC | SCGB1A1  | 10 | 10.76  | 2 | iter1 |
| LUSC | EGFL6    | 10 | 10.49  | 1 | iter2 |
| MESO | ITLN1    | 10 | 854.58 | 1 | iter1 |
| MESO | UPK3B    | 10 | 357.66 | 3 | iter1 |
| MESO | CALB2    | 6  | 344.11 | 1 | iter1 |
| MESO | MSLN     | 7  | 257.88 | 3 | iter2 |
| MESO | UPK1B    | 9  | 98.87  | 2 | iter1 |
| MESO | SAA1     | 6  | 87.85  | 4 | iter2 |
| MESO | PRG4     | 8  | 66.49  | 1 | iter2 |
| MESO | VTN      | 10 | 55.97  | 4 | iter1 |
| MESO | CPA4     | 9  | 55.30  | 1 | iter1 |
| MESO | HAS1     | 10 | 45.67  | 1 | iter1 |
| MESO | MYRF     | 6  | 39.39  | 4 | iter1 |
| MESO | BNC1     | 7  | 34.17  | 3 | iter2 |
| MESO | ANXA8    | 6  | 25.91  | 3 | iter2 |
| MESO | PDIA2    | 5  | 22.29  | 2 | iter1 |
| MESO | RSPO1    | 7  | 21.64  | 1 | iter2 |
| MESO | FAM101A  | 6  | 21.64  | 2 | iter2 |
| MESO | TMEM151A | 8  | 21.37  | 2 | iter1 |
| MESO | INMT     | 5  | 18.31  | 1 | iter2 |
| MESO | ITLN2    | 10 | 18.21  | 1 | iter1 |
| MESO | GALNT9   | 8  | 10.36  | 1 | iter2 |
| MRT  | MEST     | 5  | 390.38 | 2 | iter1 |
| MRT  | TNNT1    | 6  | 117.08 | 5 | iter2 |
| MRT  | CDC42EP5 | 8  | 93.97  | 4 | iter3 |
| MRT  | APLP1    | 10 | 62.86  | 4 | iter1 |
| MRT  | PCDH18   | 5  | 31.94  | 3 | iter1 |
| MRT  | NEFH     | 7  | 17.60  | 4 | iter2 |
| MRT  | COL26A1  | 6  | 14.02  | 2 | iter1 |
| MRT  | NPW      | 7  | 11.95  | 2 | iter1 |
| MRT  | CACNG7   | 8  | 11.33  | 2 | iter1 |
| MRT  | SLC17A7  | 9  | 10.46  | 1 | iter1 |
| NBL  | STMN2    | 10 | 807.06 | 2 | iter1 |
| NBL  | DBH      | 7  | 390.10 | 2 | iter1 |
| NBL  | TUBB2B   | 5  | 299.20 | 2 | iter2 |
| NBL  | CHGB     | 7  | 232.16 | 3 | iter1 |
| NBL  | GAP43    | 10 | 212.39 | 2 | iter1 |
| NBL  | HAND2    | 6  | 196.31 | 2 | iter1 |
| NBL  | TH       | 8  | 173.04 | 2 | iter1 |
| NBL  | PHOX2B   | 10 | 149.57 | 2 | iter1 |
| NBL  | PHOX2A   | 7  | 145.65 | 2 | iter1 |
| NBL  | HMP19    | 5  | 97.97  | 2 | iter1 |
| NBL  | GNG3     | 10 | 95.80  | 1 | iter1 |
| NBL  | RTN1     | 9  | 85.28  | 2 | iter3 |
| NBL  | STMN4    | 10 | 84.86  | 1 | iter1 |
| NBL  | PRPH     | 10 | 77.01  | 1 | iter1 |
| NBL  | RUNDC3A  | 9  | 72.47  | 2 | iter3 |
| NBL  | ISL1     | 10 | 72.42  | 1 | iter2 |
| NBL  | CELF3    | 6  | 62.51  | 2 | iter2 |
| NBL  | MAB21L2  | 10 | 55.87  | 2 | iter1 |
| NBL  | ELAVL4   | 10 | 47.86  | 1 | iter2 |

|     |           |    |        |   |       |
|-----|-----------|----|--------|---|-------|
| NBL | GFRA3     | 8  | 46.36  | 1 | iter3 |
| NBL | ELAVL3    | 8  | 42.41  | 2 | iter2 |
| NBL | MAB21L1   | 5  | 40.35  | 2 | iter2 |
| NBL | GDAP1L1   | 9  | 39.68  | 1 | iter2 |
| NBL | ACTL6B    | 8  | 38.50  | 2 | iter3 |
| NBL | ATCAY     | 5  | 38.27  | 3 | iter3 |
| NBL | C1QL1     | 6  | 37.29  | 4 | iter3 |
| NBL | HAND1     | 8  | 37.08  | 2 | iter1 |
| NBL | CADM3     | 5  | 37.00  | 2 | iter3 |
| NBL | KCNQ2     | 9  | 33.94  | 3 | iter2 |
| NBL | NTRK1     | 9  | 32.63  | 2 | iter3 |
| NBL | Mar-11    | 7  | 31.24  | 1 | iter1 |
| NBL | TTC9B     | 9  | 30.36  | 1 | iter1 |
| NBL | INSM2     | 9  | 29.26  | 1 | iter1 |
| NBL | NEFM      | 9  | 29.00  | 2 | iter1 |
| NBL | NEFL      | 5  | 27.81  | 3 | iter1 |
| NBL | HMX1      | 9  | 25.96  | 1 | iter2 |
| NBL | SNAP91    | 7  | 25.20  | 2 | iter2 |
| NBL | NRSN1     | 7  | 25.04  | 1 | iter1 |
| NBL | VSTM2A    | 7  | 23.21  | 2 | iter3 |
| NBL | NXPH1     | 7  | 21.98  | 1 | iter1 |
| NBL | DCX       | 7  | 21.37  | 1 | iter2 |
| NBL | TLX2      | 8  | 19.09  | 2 | iter2 |
| NBL | FEV       | 6  | 17.98  | 2 | iter3 |
| NBL | FAM131B   | 5  | 15.11  | 2 | iter3 |
| NBL | P2RX3     | 9  | 13.79  | 1 | iter2 |
| NBL | ASIC4     | 5  | 11.26  | 2 | iter2 |
| NBL | CNGB1     | 6  | 10.21  | 1 | iter2 |
| NHL | CD79B     | 9  | 238.17 | 1 | iter1 |
| NHL | MS4A1     | 7  | 178.40 | 1 | iter1 |
| NHL | PTGDS     | 8  | 133.42 | 5 | iter3 |
| NHL | CCL19     | 6  | 125.45 | 3 | iter1 |
| NHL | TCL1A     | 6  | 98.92  | 1 | iter2 |
| NHL | CCL18     | 6  | 82.72  | 5 | iter2 |
| NHL | PLA2G2D   | 6  | 81.67  | 1 | iter2 |
| NHL | LTB       | 5  | 70.11  | 4 | iter3 |
| NHL | CD19      | 8  | 68.00  | 1 | iter1 |
| NHL | LRMP      | 8  | 61.20  | 5 | iter3 |
| NHL | POU2AF1   | 8  | 57.50  | 2 | iter1 |
| NHL | CD22      | 8  | 51.87  | 1 | iter2 |
| NHL | DTX1      | 6  | 44.68  | 2 | iter1 |
| NHL | SPIB      | 7  | 42.42  | 1 | iter1 |
| NHL | AIM2      | 6  | 39.32  | 2 | iter2 |
| NHL | BTK       | 5  | 36.96  | 5 | iter3 |
| NHL | FAIM3     | 8  | 33.74  | 2 | iter3 |
| NHL | TNFRSF13C | 9  | 33.18  | 1 | iter2 |
| NHL | POU2F2    | 8  | 32.32  | 3 | iter2 |
| NHL | BLK       | 6  | 30.58  | 2 | iter1 |
| NHL | IRF4      | 8  | 29.91  | 4 | iter1 |
| NHL | FAM129C   | 8  | 29.33  | 1 | iter2 |
| NHL | PAX5      | 10 | 29.04  | 1 | iter2 |
| NHL | KIAA0226L | 8  | 25.71  | 2 | iter1 |
| NHL | STAP1     | 6  | 25.54  | 3 | iter2 |
| NHL | GZMK      | 10 | 22.90  | 1 | iter3 |
| NHL | CLEC17A   | 9  | 21.27  | 1 | iter1 |
| NHL | FCRL3     | 9  | 19.99  | 1 | iter1 |

|     |           |    |         |   |       |
|-----|-----------|----|---------|---|-------|
| NHL | TLR10     | 10 | 19.88   | 1 | iter3 |
| NHL | P2RX5     | 9  | 19.20   | 2 | iter3 |
| NHL | RGS13     | 10 | 17.75   | 1 | iter1 |
| NHL | IL21R     | 7  | 17.20   | 1 | iter2 |
| NHL | FCRL2     | 9  | 17.02   | 2 | iter2 |
| NHL | CLECL1    | 9  | 16.84   | 1 | iter3 |
| NHL | CD70      | 6  | 16.61   | 2 | iter3 |
| NHL | AICDA     | 10 | 15.14   | 1 | iter1 |
| NHL | MEF2B     | 10 | 12.61   | 1 | iter2 |
| NHL | TNFRSF13B | 6  | 12.13   | 2 | iter1 |
| OS  | MMP9      | 8  | 1010.67 | 2 | iter2 |
| OS  | ALPL      | 10 | 408.71  | 2 | iter2 |
| OS  | IBSP      | 10 | 369.24  | 1 | iter1 |
| OS  | MXRA8     | 9  | 241.62  | 3 | iter3 |
| OS  | IFITM5    | 10 | 210.23  | 1 | iter1 |
| OS  | TMEM119   | 6  | 143.33  | 1 | iter3 |
| OS  | SP7       | 10 | 93.79   | 1 | iter1 |
| OS  | COL11A1   | 5  | 84.52   | 1 | iter1 |
| OS  | PANX3     | 10 | 63.78   | 1 | iter1 |
| OS  | PTH1R     | 9  | 52.73   | 2 | iter1 |
| OS  | PHOSPHO1  | 8  | 50.88   | 2 | iter1 |
| OS  | SCARF2    | 5  | 49.05   | 4 | iter2 |
| OS  | COL11A2   | 5  | 30.00   | 1 | iter1 |
| OS  | OMD       | 8  | 29.70   | 1 | iter3 |
| OS  | DLX3      | 7  | 28.64   | 1 | iter2 |
| OS  | CA3       | 10 | 27.61   | 1 | iter1 |
| OS  | PRSS35    | 9  | 19.00   | 1 | iter1 |
| OS  | CDH15     | 10 | 18.33   | 1 | iter1 |
| OS  | INSC      | 5  | 16.55   | 1 | iter1 |
| OS  | ITGA10    | 8  | 15.74   | 1 | iter2 |
| OS  | HAPLN1    | 5  | 14.22   | 1 | iter1 |
| OS  | MTRNR2L12 | 5  | 13.44   | 3 | iter1 |
| OS  | KIF26A    | 9  | 12.31   | 3 | iter2 |
| OS  | CHAD      | 8  | 12.12   | 1 | iter2 |
| OS  | NDNF      | 7  | 10.97   | 3 | iter2 |
| OV  | MSLN      | 10 | 247.36  | 3 | iter2 |
| OV  | FOLR1     | 7  | 172.51  | 2 | iter1 |
| OV  | SPON1     | 6  | 159.02  | 1 | iter1 |
| OV  | KLK7      | 7  | 96.18   | 1 | iter1 |
| OV  | KLK6      | 5  | 78.40   | 3 | iter1 |
| OV  | SOX17     | 10 | 74.04   | 3 | iter1 |
| OV  | ATP6V1B1  | 9  | 64.03   | 2 | iter1 |
| OV  | SCGB2A1   | 10 | 63.64   | 2 | iter1 |
| OV  | WT1       | 9  | 46.36   | 3 | iter1 |
| OV  | KLK5      | 5  | 44.99   | 2 | iter2 |
| OV  | C1orf186  | 8  | 33.15   | 5 | iter1 |
| OV  | TNNT1     | 6  | 31.30   | 5 | iter2 |
| OV  | KCNK15    | 10 | 30.76   | 1 | iter1 |
| OV  | UPK3B     | 5  | 30.56   | 3 | iter1 |
| OV  | SCGB1D2   | 5  | 29.98   | 3 | iter1 |
| OV  | APOA1     | 8  | 29.47   | 2 | iter1 |
| OV  | KLK8      | 10 | 24.40   | 2 | iter3 |
| OV  | DAPL1     | 9  | 23.37   | 4 | iter2 |
| OV  | DOK5      | 7  | 20.74   | 2 | iter2 |
| OV  | FOXJ1     | 9  | 20.68   | 2 | iter2 |
| OV  | CRABP1    | 9  | 19.03   | 2 | iter3 |

|      |            |    |          |   |       |
|------|------------|----|----------|---|-------|
| OV   | LPAR3      | 7  | 18.76    | 2 | iter3 |
| OV   | KLHL14     | 6  | 15.18    | 2 | iter1 |
| OV   | CLDN16     | 10 | 14.87    | 2 | iter1 |
| OV   | ADRA2C     | 5  | 14.31    | 1 | iter3 |
| OV   | FGF18      | 5  | 13.91    | 2 | iter2 |
| OV   | LYPD6B     | 5  | 12.73    | 1 | iter2 |
| OV   | MUC16      | 9  | 12.02    | 1 | iter1 |
| OV   | AC234582.1 | 10 | 11.68    | 1 | iter1 |
| OV   | PNOC       | 6  | 11.58    | 2 | iter1 |
| OV   | CCNA1      | 5  | 11.08    | 1 | iter3 |
| OV   | WNT10A     | 10 | 10.84    | 1 | iter3 |
| PAAD | TFF1       | 9  | 254.76   | 4 | iter1 |
| PAAD | SFRP2      | 9  | 208.46   | 4 | iter2 |
| PAAD | CTSE       | 9  | 208.01   | 3 | iter1 |
| PAAD | INS        | 9  | 187.92   | 1 | iter1 |
| PAAD | OLFM4      | 8  | 178.37   | 4 | iter2 |
| PAAD | SPINK1     | 6  | 156.98   | 4 | iter1 |
| PAAD | TFF2       | 9  | 91.66    | 2 | iter1 |
| PAAD | REG1A      | 7  | 72.09    | 2 | iter1 |
| PAAD | TCN1       | 10 | 60.93    | 2 | iter2 |
| PAAD | SST        | 7  | 40.20    | 3 | iter1 |
| PAAD | ANXA10     | 8  | 40.07    | 2 | iter1 |
| PAAD | VSIG2      | 5  | 36.42    | 5 | iter3 |
| PAAD | CLDN2      | 8  | 35.26    | 4 | iter2 |
| PAAD | CXCL5      | 6  | 29.08    | 2 | iter1 |
| PAAD | TTR        | 7  | 27.71    | 3 | iter1 |
| PAAD | C7         | 8  | 23.04    | 5 | iter1 |
| PAAD | GCG        | 9  | 18.05    | 1 | iter1 |
| PAAD | PRSS1      | 9  | 15.40    | 1 | iter1 |
| PAAD | MUC6       | 8  | 13.39    | 1 | iter3 |
| PAAD | MUC5AC     | 6  | 12.61    | 1 | iter3 |
| PAAD | DPCR1      | 9  | 11.98    | 1 | iter3 |
| PCPG | CHGA       | 10 | 12154.29 | 1 | iter1 |
| PCPG | CHGB       | 10 | 7288.39  | 3 | iter1 |
| PCPG | DBH        | 10 | 2274.52  | 2 | iter1 |
| PCPG | DLK1       | 10 | 1648.97  | 2 | iter1 |
| PCPG | SCG2       | 10 | 1354.67  | 1 | iter1 |
| PCPG | TH         | 10 | 823.43   | 2 | iter1 |
| PCPG | IGF2       | 6  | 708.70   | 3 | iter2 |
| PCPG | EEF1A2     | 10 | 521.11   | 2 | iter3 |
| PCPG | PENK       | 10 | 497.65   | 1 | iter1 |
| PCPG | CARTPT     | 10 | 465.85   | 1 | iter1 |
| PCPG | BEX1       | 5  | 381.05   | 5 | iter2 |
| PCPG | SCG5       | 9  | 324.36   | 1 | iter3 |
| PCPG | DDC        | 7  | 226.33   | 1 | iter2 |
| PCPG | ATP1A3     | 6  | 164.00   | 2 | iter2 |
| PCPG | FAIM2      | 5  | 160.22   | 2 | iter1 |
| PCPG | CPLX2      | 5  | 154.83   | 1 | iter2 |
| PCPG | CHRNA3     | 8  | 143.24   | 2 | iter1 |
| PCPG | PHOX2A     | 5  | 132.35   | 2 | iter1 |
| PCPG | SYP        | 9  | 127.88   | 2 | iter3 |
| PCPG | TAGLN3     | 10 | 113.95   | 2 | iter2 |
| PCPG | INSM1      | 6  | 99.53    | 1 | iter2 |
| PCPG | HMP19      | 6  | 98.29    | 2 | iter1 |
| PCPG | SCG3       | 10 | 94.80    | 3 | iter3 |
| PCPG | PTPRN2     | 8  | 88.86    | 3 | iter3 |

|      |               |    |         |   |       |
|------|---------------|----|---------|---|-------|
| PCPG | PTPRN         | 5  | 86.35   | 2 | iter2 |
| PCPG | SYT4          | 6  | 85.58   | 2 | iter2 |
| PCPG | VAT1L         | 7  | 81.41   | 2 | iter2 |
| PCPG | ARHGAP36      | 8  | 80.66   | 2 | iter2 |
| PCPG | SLC18A1       | 10 | 79.90   | 1 | iter1 |
| PCPG | PCSK2         | 6  | 77.69   | 2 | iter1 |
| PCPG | VWA5B2        | 5  | 72.99   | 1 | iter2 |
| PCPG | DUSP26        | 6  | 63.01   | 4 | iter2 |
| PCPG | DNER          | 6  | 62.22   | 3 | iter3 |
| PCPG | CDK5R2        | 7  | 61.24   | 2 | iter3 |
| PCPG | PHOX2B        | 7  | 60.23   | 2 | iter1 |
| PCPG | SYT1          | 7  | 56.15   | 2 | iter2 |
| PCPG | PNMT          | 5  | 52.98   | 1 | iter2 |
| PCPG | FAM163B       | 6  | 41.82   | 2 | iter1 |
| PCPG | DRD2          | 8  | 41.75   | 1 | iter1 |
| PCPG | SPOCK3        | 6  | 39.43   | 1 | iter3 |
| PCPG | TMEM179       | 5  | 36.27   | 2 | iter2 |
| PCPG | ATCAY         | 7  | 34.16   | 3 | iter3 |
| PCPG | C18orf42      | 6  | 30.34   | 1 | iter1 |
| PCPG | FEV           | 10 | 29.33   | 2 | iter3 |
| PCPG | PRLHR         | 8  | 22.41   | 1 | iter1 |
| PCPG | MAB21L1       | 9  | 21.65   | 2 | iter2 |
| PCPG | RAB3C         | 5  | 21.02   | 2 | iter3 |
| PCPG | SLC35D3       | 6  | 19.76   | 1 | iter2 |
| PCPG | DRGX          | 6  | 16.04   | 1 | iter2 |
| PCPG | FAM19A3       | 6  | 13.04   | 1 | iter3 |
| PCPG | SLC24A2       | 6  | 11.72   | 1 | iter2 |
| PCPG | DGKK          | 10 | 10.65   | 1 | iter3 |
| PCT  | IGJ           | 10 | 8679.96 | 1 | iter2 |
| PCT  | MZB1          | 5  | 870.58  | 1 | iter2 |
| PCT  | FOSB          | 5  | 482.12  | 1 | iter1 |
| PCT  | TRIB1         | 9  | 369.21  | 2 | iter3 |
| PCT  | DERL3         | 6  | 304.89  | 1 | iter1 |
| PCT  | DUSP5         | 7  | 300.03  | 1 | iter2 |
| PCT  | TNFRSF17      | 10 | 288.04  | 1 | iter2 |
| PCT  | SLAMF7        | 6  | 266.41  | 1 | iter1 |
| PCT  | TXNDC5        | 10 | 164.08  | 1 | iter1 |
| PCT  | IRF4          | 8  | 154.63  | 4 | iter1 |
| PCT  | GPRC5D        | 10 | 137.29  | 1 | iter1 |
| PCT  | BMP6          | 9  | 125.00  | 1 | iter1 |
| PCT  | HLA-DOB       | 5  | 90.32   | 2 | iter2 |
| PCT  | CPNE5         | 6  | 88.74   | 1 | iter2 |
| PCT  | LAMP5         | 9  | 70.15   | 1 | iter3 |
| PCT  | BHLHA15       | 5  | 63.25   | 1 | iter1 |
| PCT  | FCRL5         | 9  | 53.01   | 1 | iter2 |
| PCT  | ZBP1          | 6  | 42.64   | 1 | iter1 |
| PCT  | FCRLA         | 9  | 41.23   | 3 | iter1 |
| PCT  | P2RX1         | 5  | 40.97   | 4 | iter3 |
| PCT  | GNG7          | 6  | 39.92   | 4 | iter1 |
| PCT  | CH507-42P11.8 | 9  | 39.18   | 1 | iter2 |
| PCT  | AMPD1         | 6  | 38.55   | 1 | iter1 |
| PCT  | ICAM3         | 5  | 35.80   | 3 | iter3 |
| PCT  | CCR2          | 5  | 31.84   | 1 | iter3 |
| PCT  | ALDH1L2       | 6  | 27.86   | 1 | iter3 |
| PCT  | MIXL1         | 7  | 20.57   | 1 | iter2 |
| PCT  | DKK1          | 6  | 20.13   | 1 | iter3 |

|      |          |    |         |   |       |
|------|----------|----|---------|---|-------|
| PCT  | NDNF     | 9  | 17.07   | 3 | iter2 |
| PCT  | FCRL2    | 7  | 16.62   | 2 | iter2 |
| PCT  | LRRN1    | 10 | 16.25   | 3 | iter3 |
| PCT  | UTS2R    | 9  | 16.04   | 1 | iter1 |
| PCT  | CYSLTR1  | 5  | 11.53   | 1 | iter3 |
| PCT  | DUSP26   | 6  | 11.45   | 4 | iter2 |
| PRAD | KLK3     | 10 | 4062.65 | 1 | iter1 |
| PRAD | MSMB     | 10 | 1736.91 | 1 | iter1 |
| PRAD | KLK2     | 10 | 970.11  | 1 | iter1 |
| PRAD | ACPP     | 10 | 894.93  | 1 | iter1 |
| PRAD | SLC45A3  | 7  | 482.24  | 1 | iter1 |
| PRAD | KLK4     | 10 | 413.51  | 1 | iter1 |
| PRAD | NPY      | 10 | 411.06  | 3 | iter1 |
| PRAD | AZGP1    | 6  | 399.74  | 3 | iter1 |
| PRAD | NKX3-1   | 10 | 385.52  | 1 | iter1 |
| PRAD | PLA2G2A  | 10 | 267.23  | 2 | iter1 |
| PRAD | PRAC1    | 10 | 245.55  | 1 | iter1 |
| PRAD | SLC44A4  | 5  | 211.18  | 5 | iter2 |
| PRAD | HOXB13   | 10 | 180.45  | 1 | iter1 |
| PRAD | OR51E2   | 10 | 171.28  | 1 | iter1 |
| PRAD | MYH11    | 10 | 136.61  | 1 | iter2 |
| PRAD | FOXA1    | 7  | 126.17  | 2 | iter2 |
| PRAD | FOLH1    | 10 | 110.95  | 1 | iter2 |
| PRAD | STEAP2   | 8  | 82.69   | 1 | iter2 |
| PRAD | ALDH1A3  | 7  | 71.63   | 1 | iter3 |
| PRAD | TRPM8    | 10 | 61.30   | 1 | iter1 |
| PRAD | ZG16B    | 6  | 42.00   | 3 | iter3 |
| PRAD | TMEFF2   | 6  | 35.73   | 1 | iter1 |
| PRAD | SLC4A4   | 7  | 35.57   | 5 | iter3 |
| PRAD | LRRC26   | 6  | 31.59   | 1 | iter2 |
| PRAD | ANO7     | 7  | 27.80   | 1 | iter3 |
| PRAD | UPK3A    | 10 | 27.53   | 2 | iter2 |
| PRAD | CHRM1    | 9  | 26.30   | 1 | iter1 |
| PRAD | MYBPC1   | 5  | 23.45   | 1 | iter1 |
| PRAD | PRAC2    | 10 | 23.36   | 1 | iter2 |
| PRAD | CHRNA2   | 10 | 22.76   | 1 | iter1 |
| PRAD | CPNE4    | 10 | 20.34   | 1 | iter1 |
| PRAD | ACSM1    | 8  | 19.44   | 1 | iter2 |
| PRAD | CWH43    | 10 | 17.01   | 2 | iter2 |
| PRAD | RAB3B    | 8  | 16.51   | 1 | iter2 |
| PRAD | MB       | 6  | 15.23   | 1 | iter3 |
| PRAD | TRPV6    | 10 | 14.62   | 1 | iter2 |
| PRAD | OR51E1   | 10 | 13.49   | 1 | iter2 |
| PRAD | ADRB1    | 6  | 11.43   | 1 | iter2 |
| PRAD | CUX2     | 6  | 10.21   | 1 | iter3 |
| SARC | MFAP5    | 5  | 20.46   | 1 | iter3 |
| SARC | TWIST1   | 6  | 18.71   | 3 | iter2 |
| SARC | DES      | 5  | 18.64   | 4 | iter1 |
| SARC | MRGPRF   | 7  | 16.22   | 2 | iter2 |
| SARC | TCEAL7   | 5  | 10.34   | 5 | iter1 |
| SKCM | PMEL     | 10 | 2006.33 | 2 | iter1 |
| SKCM | APOD     | 10 | 425.01  | 1 | iter2 |
| SKCM | S100B    | 8  | 376.70  | 2 | iter1 |
| SKCM | TYR      | 10 | 264.49  | 2 | iter1 |
| SKCM | MLANA    | 10 | 249.78  | 2 | iter1 |
| SKCM | SERPINE2 | 9  | 168.89  | 2 | iter2 |

|      |         |    |        |   |       |
|------|---------|----|--------|---|-------|
| SKCM | PRAME   | 7  | 139.98 | 4 | iter2 |
| SKCM | TYRP1   | 9  | 100.77 | 2 | iter1 |
| SKCM | EDNRB   | 8  | 84.34  | 4 | iter2 |
| SKCM | DCT     | 10 | 67.44  | 1 | iter1 |
| SKCM | GPR143  | 6  | 64.73  | 2 | iter1 |
| SKCM | PLP1    | 10 | 64.34  | 2 | iter1 |
| SKCM | LZTS1   | 5  | 48.76  | 3 | iter1 |
| SKCM | BIRC7   | 9  | 40.97  | 3 | iter2 |
| SKCM | MITF    | 8  | 37.03  | 4 | iter3 |
| SKCM | SNCA    | 5  | 36.88  | 1 | iter3 |
| SKCM | SLC45A2 | 10 | 36.13  | 2 | iter1 |
| SKCM | MIA     | 7  | 36.02  | 1 | iter1 |
| SKCM | GYG2    | 8  | 34.67  | 3 | iter2 |
| SKCM | GPM6B   | 8  | 34.45  | 3 | iter3 |
| SKCM | MMP17   | 6  | 26.10  | 3 | iter3 |
| SKCM | TRIM63  | 6  | 20.60  | 2 | iter1 |
| SKCM | EXTL1   | 7  | 19.41  | 2 | iter2 |
| SKCM | FCRLA   | 8  | 19.29  | 3 | iter1 |
| SKCM | DAAM2   | 7  | 18.32  | 4 | iter3 |
| SKCM | CA14    | 5  | 16.05  | 2 | iter1 |
| SKCM | CRTAC1  | 6  | 15.83  | 3 | iter2 |
| SKCM | CORO2B  | 7  | 14.85  | 2 | iter3 |
| SKCM | BCHE    | 6  | 11.15  | 2 | iter2 |
| SKCM | GAPDHS  | 6  | 10.32  | 2 | iter1 |
| STAD | TFF1    | 10 | 153.21 | 4 | iter1 |
| STAD | SPINK1  | 10 | 117.18 | 4 | iter1 |
| STAD | CTSE    | 5  | 96.69  | 3 | iter1 |
| STAD | CLDN18  | 10 | 64.30  | 2 | iter1 |
| STAD | TMEM238 | 5  | 37.97  | 4 | iter1 |
| STAD | PGC     | 10 | 36.51  | 3 | iter1 |
| STAD | CST1    | 6  | 33.41  | 4 | iter1 |
| STAD | AGR3    | 6  | 29.98  | 5 | iter2 |
| STAD | REG4    | 9  | 29.26  | 3 | iter1 |
| STAD | TFF2    | 8  | 23.75  | 2 | iter1 |
| STAD | PHGR1   | 9  | 22.83  | 2 | iter2 |
| STAD | ACTG2   | 7  | 22.47  | 5 | iter1 |
| STAD | GATA6   | 5  | 22.00  | 5 | iter2 |
| STAD | HNF4A   | 5  | 18.23  | 4 | iter2 |
| STAD | DMBT1   | 6  | 17.15  | 3 | iter3 |
| STAD | MUC3A   | 7  | 15.91  | 2 | iter3 |
| STAD | GREM1   | 6  | 14.20  | 1 | iter3 |
| STAD | FOXA3   | 5  | 13.56  | 4 | iter3 |
| STAD | SOX18   | 6  | 12.93  | 4 | iter3 |
| STAD | GATA4   | 10 | 11.80  | 2 | iter1 |
| STAD | FOXA2   | 6  | 11.63  | 4 | iter2 |
| STAD | CXCL5   | 10 | 10.57  | 2 | iter1 |
| TGCT | POU5F1  | 7  | 365.40 | 1 | iter1 |
| TGCT | DPPA5   | 9  | 247.01 | 1 | iter1 |
| TGCT | KHDC3L  | 10 | 178.34 | 1 | iter1 |
| TGCT | L1TD1   | 8  | 110.09 | 1 | iter1 |
| TGCT | DPPA3   | 8  | 101.65 | 1 | iter1 |
| TGCT | CLDN6   | 7  | 94.81  | 1 | iter1 |
| TGCT | NLRP7   | 7  | 75.86  | 1 | iter1 |
| TGCT | GDF3    | 9  | 73.96  | 1 | iter1 |
| TGCT | LIN28A  | 9  | 64.25  | 1 | iter1 |
| TGCT | NANOG   | 8  | 53.33  | 1 | iter1 |

|      |         |    |         |   |       |
|------|---------|----|---------|---|-------|
| TGCT | DPPA4   | 9  | 43.61   | 1 | iter1 |
| TGCT | UTF1    | 10 | 40.60   | 1 | iter2 |
| TGCT | ZFP42   | 5  | 37.67   | 1 | iter1 |
| TGCT | ALPPL2  | 8  | 35.32   | 1 | iter2 |
| TGCT | VENTX   | 7  | 28.22   | 1 | iter3 |
| TGCT | SLC7A3  | 5  | 28.10   | 1 | iter1 |
| TGCT | MT1H    | 5  | 25.08   | 1 | iter3 |
| TGCT | GIP     | 8  | 24.49   | 1 | iter1 |
| TGCT | TRIM71  | 10 | 22.27   | 1 | iter2 |
| TGCT | TRIML2  | 5  | 21.68   | 1 | iter1 |
| TGCT | RPRM    | 6  | 20.44   | 2 | iter2 |
| TGCT | PRDM14  | 8  | 19.38   | 1 | iter1 |
| TGCT | VRTN    | 8  | 14.60   | 1 | iter1 |
| TGCT | HDGFL1  | 10 | 14.11   | 1 | iter2 |
| TGCT | LIM2    | 10 | 12.85   | 1 | iter2 |
| TGCT | FOXH1   | 10 | 11.71   | 1 | iter2 |
| TGCT | NANOGP8 | 5  | 10.55   | 1 | iter1 |
| THCA | TG      | 10 | 2330.47 | 1 | iter1 |
| THCA | ZCCHC12 | 10 | 119.95  | 1 | iter2 |
| THCA | S100A1  | 7  | 108.00  | 4 | iter1 |
| THCA | PAX8    | 6  | 107.94  | 5 | iter1 |
| THCA | TSHR    | 10 | 95.03   | 1 | iter1 |
| THCA | NKX2-1  | 10 | 94.30   | 2 | iter1 |
| THCA | CITED1  | 9  | 92.11   | 4 | iter1 |
| THCA | SFTPB   | 8  | 87.15   | 4 | iter1 |
| THCA | KCNJ16  | 9  | 72.57   | 3 | iter1 |
| THCA | FOXE1   | 6  | 70.02   | 1 | iter1 |
| THCA | ZBED2   | 6  | 56.91   | 2 | iter1 |
| THCA | C2orf40 | 10 | 54.89   | 1 | iter3 |
| THCA | INPP5J  | 6  | 54.11   | 2 | iter2 |
| THCA | MUC15   | 6  | 51.19   | 1 | iter1 |
| THCA | IYD     | 10 | 48.93   | 1 | iter1 |
| THCA | SFTA3   | 7  | 48.54   | 2 | iter1 |
| THCA | LCN12   | 7  | 40.16   | 1 | iter1 |
| THCA | IGSF1   | 8  | 39.43   | 1 | iter1 |
| THCA | SNX22   | 10 | 39.20   | 1 | iter2 |
| THCA | LMO3    | 5  | 32.02   | 2 | iter1 |
| THCA | DCSTAMP | 8  | 31.60   | 1 | iter1 |
| THCA | RXRG    | 5  | 30.52   | 2 | iter2 |
| THCA | PCSK2   | 6  | 30.31   | 2 | iter1 |
| THCA | KCNJ15  | 9  | 27.50   | 3 | iter3 |
| THCA | PDE8B   | 6  | 25.60   | 1 | iter2 |
| THCA | NTRK2   | 7  | 24.37   | 2 | iter3 |
| THCA | FCGBP   | 9  | 24.04   | 2 | iter3 |
| THCA | TPO     | 10 | 23.04   | 1 | iter1 |
| THCA | ATP13A4 | 8  | 21.44   | 1 | iter3 |
| THCA | PEBP4   | 5  | 18.85   | 2 | iter3 |
| THCA | SLC26A7 | 7  | 17.34   | 2 | iter3 |
| THCA | SLC26A4 | 9  | 17.00   | 1 | iter2 |
| THCA | TCERG1L | 6  | 16.91   | 1 | iter1 |
| THCA | SLC30A2 | 7  | 15.88   | 1 | iter2 |
| THCA | SLC27A6 | 8  | 14.53   | 1 | iter3 |
| THCA | ST6GAL2 | 7  | 12.16   | 1 | iter2 |
| THCA | CRYGN   | 10 | 11.45   | 1 | iter2 |
| THCA | KLHDC8A | 7  | 11.03   | 2 | iter2 |
| THYM | CCL25   | 10 | 1596.52 | 1 | iter1 |



|      |         |    |         |   |       |
|------|---------|----|---------|---|-------|
| THYM | S100A14 | 5  | 512.46  | 5 | iter2 |
| THYM | CD3D    | 6  | 411.37  | 1 | iter3 |
| THYM | PRSS16  | 10 | 363.23  | 1 | iter2 |
| THYM | TBATA   | 10 | 341.35  | 1 | iter1 |
| THYM | CD1E    | 7  | 226.06  | 1 | iter1 |
| THYM | DNTT    | 10 | 218.85  | 2 | iter1 |
| THYM | CD1B    | 10 | 199.09  | 1 | iter1 |
| THYM | CD1A    | 5  | 151.55  | 1 | iter1 |
| THYM | PTCRA   | 6  | 148.57  | 1 | iter1 |
| THYM | PAX1    | 10 | 135.90  | 1 | iter1 |
| THYM | CD8B    | 5  | 125.21  | 1 | iter3 |
| THYM | CD1C    | 6  | 63.09   | 1 | iter3 |
| THYM | SH2D1A  | 5  | 62.64   | 1 | iter3 |
| THYM | CTSV    | 6  | 56.93   | 2 | iter2 |
| THYM | FAM107A | 6  | 45.69   | 2 | iter2 |
| THYM | FOXN1   | 10 | 43.78   | 1 | iter1 |
| THYM | PSMB11  | 10 | 40.68   | 1 | iter1 |
| THYM | RAG1    | 9  | 39.39   | 1 | iter1 |
| THYM | CBFA2T3 | 5  | 32.25   | 4 | iter2 |
| THYM | KREMEN2 | 9  | 30.72   | 1 | iter2 |
| THYM | BEND5   | 6  | 28.44   | 2 | iter3 |
| THYM | SIX1    | 7  | 23.77   | 2 | iter2 |
| THYM | APOBEC2 | 7  | 22.92   | 1 | iter2 |
| THYM | PAX9    | 9  | 22.09   | 1 | iter1 |
| THYM | FAM163A | 6  | 20.15   | 3 | iter1 |
| THYM | RAG2    | 9  | 18.49   | 1 | iter1 |
| THYM | PNMAL2  | 6  | 13.46   | 1 | iter2 |
| THYM | CCR9    | 8  | 12.87   | 1 | iter2 |
| UCEC | WFDC2   | 10 | 894.38  | 3 | iter1 |
| UCEC | SCGB2A1 | 10 | 281.58  | 2 | iter1 |
| UCEC | MSX1    | 10 | 100.97  | 1 | iter1 |
| UCEC | SOX17   | 10 | 100.22  | 3 | iter1 |
| UCEC | CAPS    | 7  | 65.70   | 2 | iter1 |
| UCEC | DLX5    | 10 | 48.34   | 2 | iter1 |
| UCEC | ASRGL1  | 7  | 42.41   | 4 | iter2 |
| UCEC | HOXB6   | 5  | 26.75   | 4 | iter2 |
| UCEC | VTCN1   | 7  | 26.18   | 4 | iter1 |
| UCEC | ESR1    | 10 | 21.47   | 2 | iter1 |
| UCEC | SCGB1D2 | 7  | 21.36   | 3 | iter1 |
| UCEC | MECOM   | 5  | 20.70   | 4 | iter2 |
| UCEC | HOXB8   | 9  | 18.72   | 3 | iter2 |
| UCEC | HOXB5   | 8  | 18.16   | 2 | iter3 |
| UCEC | LGR5    | 8  | 13.67   | 1 | iter1 |
| UCEC | C2orf88 | 6  | 11.02   | 2 | iter3 |
| UVM  | PMEL    | 10 | 2725.92 | 2 | iter1 |
| UVM  | TYRP1   | 10 | 1171.35 | 2 | iter1 |
| UVM  | MLANA   | 10 | 654.15  | 2 | iter1 |
| UVM  | CITED1  | 10 | 401.19  | 4 | iter1 |
| UVM  | CRTAC1  | 9  | 268.31  | 3 | iter2 |
| UVM  | EFHD1   | 9  | 213.95  | 3 | iter1 |
| UVM  | RAB38   | 9  | 213.21  | 2 | iter2 |
| UVM  | SLC7A8  | 5  | 212.90  | 1 | iter2 |
| UVM  | TYR     | 10 | 182.13  | 2 | iter1 |
| UVM  | MLPH    | 6  | 107.90  | 4 | iter3 |
| UVM  | TUBB4A  | 5  | 101.47  | 5 | iter2 |
| UVM  | LRRN4CL | 5  | 91.27   | 1 | iter1 |

|     |          |    |       |   |       |
|-----|----------|----|-------|---|-------|
| UVM | BIRC7    | 7  | 77.52 | 3 | iter2 |
| UVM | SLC6A17  | 7  | 72.12 | 1 | iter1 |
| UVM | GPRC5B   | 7  | 61.09 | 4 | iter3 |
| UVM | GAPDHS   | 10 | 56.40 | 2 | iter1 |
| UVM | OCA2     | 5  | 56.16 | 1 | iter1 |
| UVM | MITF     | 7  | 55.51 | 4 | iter3 |
| UVM | LGI3     | 8  | 48.79 | 1 | iter1 |
| UVM | PAX3     | 10 | 44.69 | 2 | iter1 |
| UVM | D4S234E  | 7  | 42.99 | 4 | iter2 |
| UVM | CA14     | 9  | 40.37 | 2 | iter1 |
| UVM | KIT      | 9  | 37.94 | 4 | iter3 |
| UVM | SLC7A4   | 9  | 34.85 | 2 | iter1 |
| UVM | TRPM1    | 10 | 28.49 | 1 | iter1 |
| UVM | HSPB2    | 10 | 26.04 | 1 | iter2 |
| UVM | RASGRP3  | 10 | 25.11 | 3 | iter2 |
| UVM | RGS20    | 7  | 22.94 | 1 | iter3 |
| UVM | SLC45A2  | 10 | 22.86 | 2 | iter1 |
| UVM | ALX1     | 9  | 22.83 | 2 | iter2 |
| UVM | EXTL1    | 9  | 20.56 | 2 | iter2 |
| UVM | ABCB5    | 8  | 19.50 | 1 | iter2 |
| UVM | CAPN3    | 9  | 16.78 | 1 | iter3 |
| UVM | SOX1     | 7  | 16.22 | 1 | iter2 |
| UVM | PKNOX2   | 8  | 15.92 | 1 | iter3 |
| UVM | STK32A   | 5  | 15.81 | 1 | iter3 |
| UVM | ABCC11   | 9  | 13.18 | 1 | iter1 |
| UVM | TMEM200C | 9  | 11.82 | 1 | iter2 |
| UVM | ASB11    | 10 | 10.25 | 1 | iter2 |
